# Supplementary material for: Review of drug recalls and quality of pharmaceutical products in Nepal
Source: PubMed Central journal article supplement — BMJ Open. 2022 Jul 4;12(7):e053479. doi: 10.1136/bmjopen-2021-053479 (PMC9255392; doi:10.1136/bmjopen-2021-053479), 2022-07-04
Supplement: bmjopen-2021-053479.draft_revisions.pdf [file bmjopen-2021-053479.draft_revisions.pdf]

# BMJ Open

BMJ Open is committed to open peer review. As part of this commitment we make the peer review history of every article we publish publicly available.

When an article is published we post the peer reviewers' comments and the authors' responses online. We also post the versions of the paper that were used during peer review. These are the versions that the peer review comments apply to.

The versions of the paper that follow are the versions that were submitted during the peer review process. They are not the versions of record or the final published versions. They should not be cited or distributed as the published version of this manuscript.

BMJ Open is an open access journal and the full, final, typeset and author-corrected version of record of the manuscript is available on our site with no access controls, subscription charges or pay-per-view fees (<http://bmjopen.bmj.com>).

If you have any questions on BMJ Open's open peer review process please email [info.bmjopen@bmj.com](mailto:info.bmjopen@bmj.com)

# BMJ Open

## Incidences of poor-quality pharmaceutical products in Nepal

|                               |                                                                                                                                                                                                                                                                                                                                                                              |
|-------------------------------|------------------------------------------------------------------------------------------------------------------------------------------------------------------------------------------------------------------------------------------------------------------------------------------------------------------------------------------------------------------------------|
| Journal:                      | <i>BMJ Open</i>                                                                                                                                                                                                                                                                                                                                                              |
| Manuscript ID                 | bmjopen-2021-053479                                                                                                                                                                                                                                                                                                                                                          |
| Article Type:                 | Original research                                                                                                                                                                                                                                                                                                                                                            |
| Date Submitted by the Author: | 16-May-2021                                                                                                                                                                                                                                                                                                                                                                  |
| Complete List of Authors:     | Neupane, Astha; Kathmandu Institute of Applied Sciences, Center for Analytical Sciences<br>Bastakoti, Maheshwor; Kathmandu Institute of Applied Sciences, Center for Analytical Sciences<br>Tamang, Sabita; Kathmandu Institute of Applied Sciences, Center for Analytical Sciences<br>Giri, Basant; Kathmandu Institute of Applied Sciences, Center for Analytical Sciences |
| Keywords:                     | Public health < INFECTIOUS DISEASES, COVID-19, Health economics < HEALTH SERVICES ADMINISTRATION & MANAGEMENT                                                                                                                                                                                                                                                                |
|                               |                                                                                                                                                                                                                                                                                                                                                                              |

SCHOLARONE™  
Manuscripts

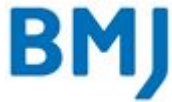

I, the Submitting Author has the right to grant and does grant on behalf of all authors of the Work (as defined in the below author licence), an exclusive licence and/or a non-exclusive licence for contributions from authors who are: i) UK Crown employees; ii) where BMJ has agreed a CC-BY licence shall apply, and/or iii) in accordance with the terms applicable for US Federal Government officers or employees acting as part of their official duties; on a worldwide, perpetual, irrevocable, royalty-free basis to BMJ Publishing Group Ltd ("BMJ") its licensees and where the relevant Journal is co-owned by BMJ to the co-owners of the Journal, to publish the Work in this journal and any other BMJ products and to exploit all rights, as set out in our [licence](#).

The Submitting Author accepts and understands that any supply made under these terms is made by BMJ to the Submitting Author unless you are acting as an employee on behalf of your employer or a postgraduate student of an affiliated institution which is paying any applicable article publishing charge ("APC") for Open Access articles. Where the Submitting Author wishes to make the Work available on an Open Access basis (and intends to pay the relevant APC), the terms of reuse of such Open Access shall be governed by a Creative Commons licence – details of these licences and which [Creative Commons](#) licence will apply to this Work are set out in our licence referred to above.

Other than as permitted in any relevant BMJ Author's Self Archiving Policies, I confirm this Work has not been accepted for publication elsewhere, is not being considered for publication elsewhere and does not duplicate material already published. I confirm all authors consent to publication of this Work and authorise the granting of this licence.

# Incidences of poor-quality pharmaceutical products in Nepal

Astha Neupane, Maheshwor Bastakoti, Sabita Tamang, Basant Giri\*

Center for Analytical Sciences, Kathmandu Institute of Applied Sciences

P. O. Box 23002, Kathmandu, Nepal

\*Correspondence

Dr. Basant Giri

Center for Analytical Sciences, Kathmandu Institute of Applied Sciences

PO BOX 23003, Kathmandu, Nepal

bgiri@kias.org.np

**Word count:** 3680

1  
2  
3 **27 ABSTRACT**  
4

5 **28 Objectives:** To evaluate the pattern of substandard and falsified pharmaceutical products in  
6  
7  
8 **29** Nepal.  
9

10 **30**  
11  
12 **31 Setting:** We analyzed drug recall notices from 2010 – 2020 by the department of drug  
13  
14 **32** administration (DDA), Nepal and systematically reviewed peer reviewed research articles.  
15  
16

17 **33**  
18  
19 **34 Participants:** A total of 72 drug recall notices issued from 2010 to 2020 by DDA were included.  
20  
21 **35** Only four research papers that reported original drug quality data from Nepal were included.  
22  
23

24 **36**  
25  
26 **37 Results:** A total of 346 pharmaceutical products were recalled during the reported period. The  
27  
28 **38** number of recalled pharmaceutical products has increased significantly over the past decade in  
29  
30 **39** Nepal. The most frequently recalled drugs were the antimicrobials followed by gastrointestinal  
31  
32 **40** medicines, vitamins and supplements, pain and palliative medicines among others. Number of  
33  
34 **41** imported recalled drugs were slightly higher (153) than domestic recalled drugs (141). Sixty-two  
35  
36 **42** percentage of recalled drugs were substandard, 11% were falsified and remaining 27% were not  
37  
38 **43** registered at the DDA. Similarly, higher number of modern drugs (62%) were recalled than  
39  
40 **44** traditional ones (35%). The hand sanitizers used to minimize the COVID-19 transmission  
41  
42 **45** contributed significantly to the list of recalled pharmaceutical products in 2020. Most of these  
43  
44 **46** sanitizers contained significant amount of methanol (as high as 75%v/v) instead of appropriate  
45  
46 **47** amount of ethyl or isopropyl alcohol. The peer-reviewed research papers reported issues with  
47  
48 **48** labeling, unregistered drugs and drugs failed in several laboratory testing.  
49  
50  
51  
52  
53

54 **49**  
55  
56  
57  
58  
59  
60

1  
2  
3 50 Conclusions: The substandard and/or falsified drugs that do not meet regulatory standards and  
4  
5 51 quality threaten health of population putting patients' life in danger leading to socio-economic  
6  
7 52 hardship. Our analysis showed that cases of substandard and fake drugs are increasing in Nepal.  
8  
9 53 Since the recall data in this paper did not include number of samples tested and location of  
10  
11 54 samples collected, a systematic study to understand the prevalence of substandard and falsified  
12  
13 55 drugs in Nepal is recommended.  
14  
15

16  
17 56 **Keywords:** Counterfeit drugs, falsified medical products, public health, substandard, fake drugs  
18  
19

#### Strength and imitations of this study

- This is the first study to evaluate the pattern of drug recall in Nepal.
- We analyzed drug recall data from department of drug administration in Nepal and report that the substandard and falsified pharmaceutical products are increasing significantly.
- This study suggested the problem of substandard and falsified pharmaceutical products is serious in Nepal. Antimicrobial drugs were the most frequently recalled drugs. Drugs manufactured by domestic producers and imported ones were recalled. Allopathic drugs were recalled more than ayurvedic products.
- Since the recall data did not provide number of samples tested and location of sample collection, this study did not report rate of recall and location wise prevalence of substandard and falsified drugs in Nepal.

20  
21  
22  
23  
24  
25  
26  
27  
28  
29  
30  
31  
32  
33  
34  
35  
36  
37 57  
38 58  
39 59  
40

## 60 INTRODUCTION

41  
42  
43  
44 61 Pharmaceutical products are essential to treat, prevent, and save lives of millions of people  
45  
46 62 globally<sup>1</sup>. They should be safe, effective, and of good quality. Such products should be prescribed  
47  
48 63 by authorized medical practitioner and used rationally<sup>2</sup>. However, pharmaceutical products that do  
49  
50 64 not meet regulatory standards and quality threaten the health of the population of today and future.  
51  
52 65 Such products may be substandard or low-quality or falsified. Substandard or falsified drugs could  
53  
54 66 lead to drug resistances and put life of patients in danger in addition to creating economic and  
55  
56  
57  
58  
59  
60

1  
2  
3 67 social burden to people<sup>3</sup>. There are several reasons for the circulation of such substandard and  
4  
5 68 falsified products in market such as lack of access to affordable, quality, safe and effective medical  
6  
7  
8 69 products, and good governance, poor ethical practices in health care facilities and medicine outlets.  
9  
10 70 Limited technical capacity in manufacturing, quality control, distribution and testing also  
11  
12 71 contribute to the same problem<sup>4,5</sup>.

13  
14  
15 72 A recent meta-data analysis estimated that about 10.5% of the medicines worldwide are either  
16  
17 73 substandard or falsified. Prevalence of low-quality pharmaceutical products is higher in low- and  
18  
19 74 middle-income countries (13.6%) compared to high income countries. About 18.7% medicines  
20  
21 75 have been estimated to be low-quality in Africa and 13.7% in Asia. The most substandard or  
22  
23 76 falsified drugs are the antimalarials (19.1%)<sup>3</sup>.

24  
25  
26  
27 77 Nepal is one of the least developed countries that shares open and poorly regulated borders with  
28  
29 78 India and China. These two countries are considered as the major producers of low-quality and  
30  
31 79 fake pharmaceutical products circulating in the global market<sup>4</sup>. The domestic market for medical  
32  
33 80 products in Nepal was estimated to be 70 billion Nepal rupees in 2019 that included drugs (36  
34  
35 81 billion), raw materials and surgical equipment<sup>6</sup>. The department of drug administration (DDA)  
36  
37 82 authorizes the distribution of all pharmaceutical products in Nepal including production,  
38  
39 83 distribution, export and import. The DDA in Nepal is equivalent to U.S. FDA and is responsible  
40  
41 84 to prevent the misuse or abuse of drugs and allied pharmaceutical substances<sup>7</sup>. Few studies in past  
42  
43 85 have indicated the circulation of substandard, counterfeit, and unregistered drugs in the Nepali  
44  
45 86 market<sup>8,9,10</sup>. The DDA Nepal recalls marketed drugs if the drugs do not fulfill any requirement as  
46  
47 87 indicated in the drug act 2035 B.S.<sup>7</sup>. It then issues public alerts and warnings when substandard,  
48  
49 88 falsified, and unregistered medicine incidents are detected.

50  
51 89 In this study, we report the incidences of poor-quality drugs in Nepal by analyzing drug recall  
52  
53  
54  
55  
56  
57

1  
2  
3 90 notice issued by the DDA. We analyzed temporal trend of low-quality drugs, types of drugs and  
4  
5 91 formulations, origin of drugs & manufacturers and reasoning for recall. We also reviewed research  
6  
7 92 publications that reported drug quality data. We found that the low-quality drugs have increased  
8  
9 93 significantly in Nepal that over the last decade and among them antimicrobials are the most found  
10  
11 94 low-quality drugs.  
12  
13  
14

## 15 95 **METHODOLOGY**

16  
17  
18 96 We carefully analyzed drug recall notice published by DDA Nepal from 2010 to 2020. The DDA  
19  
20 97 publishes such notices in its bulletins, websites, and newspapers. We extracted all the information  
21  
22 98 provided on the recall notice such as brand name, dosage form, batch number, manufacturing date,  
23  
24 99 expiry date, recall date, reason of non-compliance, and the manufacturer information. We used  
25  
26  
27 100 National List of Essential Medicines 2016 of Nepal to classify the recalled drugs into essential and  
28  
29 101 non-essential drugs<sup>11</sup> and the WHO definition to identify substandard, falsified and unregistered  
30  
31 102 drugs<sup>12</sup>. According to WHO definition, the substandard drugs are authorized medical products but  
32  
33 103 fail to meet quality standards or specifications or both. Similarly, falsified drugs are medical  
34  
35 104 products that misrepresent their identity, composition or source<sup>13</sup>. Pharmaceutical products that  
36  
37 105 did not pass dissolution test, API assay, microbial test, leakage test, friability, non-compliance  
38  
39 106 with pharmacopeia, physical appearance, fungal count, weight variation, particulate matter test,  
40  
41 107 uniformity test, disintegration test, and pH test were put together under substandard category.  
42  
43 108 Similarly, drugs that contained impurities, active ingredient not meant to be there, had price sticker  
44  
45 109 without approval, and did not have product specification were classified as falsified  
46  
47 110 pharmaceutical products. The drugs that were recalled because they were not registered at DDA  
48  
49 111 Nepal were classified under unregistered category. Unregistered drugs do not undergo evaluation  
50  
51 112 and/or approval by DDA Nepal.  
52  
53  
54  
55  
56  
57  
58  
59  
60



1  
2  
3 113 In addition to the recall notice, we also analyzed peer reviewed research articles from electronic  
4  
5 114 databases such as PubMed (2010-2020), Web of Science (2010-2020), Springer link (2010-2020),  
6  
7  
8 115 and Google Scholar (2010-2020). We used the following search terms in conjunction with Boolean  
9  
10 116 search term (“OR”, “AND”) to identify related articles: “counterfeit\*”, “substandard\*”,  
11  
12 117 “falsified\*”, “fake”, “spurious”, “unregulated drugs”, “unregistered”, or “frauds”; combined with  
13  
14 118 “drug”, “medicine”, or “pharmaceutical”; “Nepal\*”. In Google Scholar same search terms were  
15  
16  
17 119 used, but instead of “Nepal\*”, we used “intitle:Nepal”. The articles were screened and evaluated  
18  
19 120 manually through the title and abstract based on inclusion criteria: date of publication (2010-2020),  
20  
21 121 the language (English) in which the article was published, the article should contain  
22  
23 122 data/information on the prevalence of falsified/spurious/counterfeit/substandard drugs and the  
24  
25 123 location of experiment/research carried out. Similarly, the articles which did not meet inclusion  
26  
27  
28 124 criteria were excluded. We also did not include opinion articles, letters, notes, conference papers,  
29  
30 125 book chapters, editorials or comments or articles with no abstracts or articles with counterfeit or  
31  
32 126 substandard medicines related to animals.

33  
34  
35  
36 127 Statistical analyses of data such as Chi-square test, Fisher exact test and simple linear regression  
37  
38 128 were performed using R version 1.4.1106.

39  
40  
41 129 Patients and public involvement: Patient or the public were not involved in the design, or conduct,  
42  
43 130 or reporting, or dissemination plans of our research.

## 44 45 46 47 131 **RESULTS**

48 132  
49 133 We analyzed recalled drugs during the period of 2010 – 2020. During this period 346  
50  
51 134 pharmaceutical products were recalled by DDA Nepal. The number of recalled low-quality drugs  
52  
53 135 in Nepal has significantly increased in the last decade (figure 1A, linear regression, p-value < 0.05,  
54  
55  
56  
57  
58  
59  
60

1  
2  
3 136 adjusted R-squared value= 0.335). We found that only one pharmaceutical product was recalled in  
4  
5 137 2010. The product was the lactate solution which is commonly used for fluid resuscitation. The  
6  
7 138 lactate was recalled from Nepali market since it did not pass the sterility test. There was no recall  
8  
9  
10 139 in 2012. The year of 2018 had the highest number of pharmaceutical products recalled (123  
11  
12 140 products, see figure 1a). Forty-six products were recalled in the year 2020, majority of which were  
13  
14 141 hand sanitizers. The recalled pharmaceutical products were from 96 manufacturers mostly from  
15  
16 142 Nepal and India, few from Australia, Bangladesh, and China. Manufacturer of 91 recalled drugs  
17  
18 143 were unknown. The recalled pharmaceutical products included a significantly (two-sided fisher  
19  
20 144 exact test, p-value <0.001) higher number of imported medicines (153) items than domestically  
21  
22 145 manufactured the imported (141) ones which were manufactured mostly in India (97%, figure 1B).  
23  
24 146 Few drugs from Australia, Bangladesh and China were also recalled. Country of origin of 52  
25  
26 147 recalled pharmaceutical products were not identified.

27  
28  
29  
30  
31 148 **Figure 1:** (A) Temporal trend of recalled pharmaceutical products in Nepal. (B) Contribution of  
32  
33 149 different category of pharmaceutical products in the recall list.

34  
35  
36 150 Sixty percentage (n=346) of recalled pharmaceutical products were modern or allopathic (208)  
37  
38 151 and 35% were traditional or ayurvedic (120) (figure 1B). Two-sided fisher exact test showed that  
39  
40 152 significantly large number of modern pharmaceutical products were recalled (p-value< 0.001).  
41  
42 153 Twenty-seven percentage of the recalled drugs were unregistered at the DDA indicating they were  
43  
44 154 not authorized to distribute and sell in Nepal. Similarly, twenty percentage of the recalled drugs,  
45  
46 155 mostly allopathic, were listed as essential medicines. Essential medicines are distributed free of  
47  
48 156 cost through government health centers. Remaining 40% drugs were non-essential ones (p-value  
49  
50 157 < 0.001) and equal number of ayurvedic drugs were categorized as others since such drugs are not  
51  
52 158 classified as essential or non-essential. Majority of the recalled pharmaceutical products were  
53  
54  
55  
56  
57  
58  
59  
60

1  
2  
3 159 substandard (215) followed by unregistered (93) and falsified (38) (see figure 1B). We found that  
4  
5 160 the recall pattern among these three categories were significantly different (one-way chi-square  
6  
7  
8 161 test, p-value < 0.001, X-squared = 142.31, df = 2).  
9

10 162 **Figure 2:** (A) Categories of recalled drugs based on their therapeutics, (B) Types of dosage  
11  
12 163 forms of recalled drugs, (C) Major reasons for recalling the pharmaceutical products, (D) Self  
13  
14 164 life of recalled pharmaceutical products after the recall (in months).  
15  
16

17 165 Based on the brand names of each non-ayurvedic pharmaceutical product, we identified their  
18  
19 166 generic names and then categorized them into different groups based on their therapeutic  
20  
21 167 properties. The top 10 most recalled drugs belonged to antimicrobials (47) followed by  
22  
23 168 gastrointestinal medicines (35), vitamins and minerals (28), antiseptic (23), hormones and  
24  
25 169 contraceptives (18), and pain and palliative care medicines (16), fluid and electrolyte  
26  
27 170 replenishment (13), cardiovascular and renal drugs (7), anti-diabetes (5) and antihistamines (5)  
28  
29 171 (see figure 2A). Remaining recalled drugs were CNS drugs, respiratory system drugs,  
30  
31 172 prostaglandin analogues, antirheumatic. Nineteen drugs were not classified into any of those and  
32  
33 173 labeled as “others” because enough information was not available. Similarly, ayurvedic drugs were  
34  
35 174 not including in this categorization. The DDA provided reason(s) for every recalled  
36  
37 175 pharmaceutical product. Large number of drugs were recalled because they were not registered  
38  
39 176 (93) at DDA. The most common reason for recall among registered drugs was the failure to comply  
40  
41 177 with microbial test (82) followed by failures in dissolution test (40), in quantitative assay for active  
42  
43 178 pharmaceutical ingredient (23), and in physical characteristics and packaging (23). Eleven  
44  
45 179 products did not comply label requirements and 12 had one or more impurity. Few samples  
46  
47 180 categorized as “others” were recalled due to failure in identification test and contained active  
48  
49 181 ingredient in dietary supplements (see figure 2B). Tablets were the most recalled dosages form  
50  
51  
52  
53  
54  
55  
56  
57  
58  
59  
60

1  
2  
3 182 followed by powder, solution, capsules, syrups/suspension, cream/ointment. Dosage forms of  
4  
5 183 some products were not identifiable, and they are categorized as “others” (figure 2C). The shelf-  
6  
7 184 life of recalled drugs ranged from less than three months (16.4%) to more than two years at the  
8  
9 185 time of recall (figure 2D).

### 186 **Low-quality drugs reported in research papers**

15 187 We also systematically investigated the published research works in order to find the reporting of  
16  
17 188 low-quality drugs in Nepali market. A flow chart of search procedure is given in figure 3. Initially,  
18  
19 189 we identified 467 journal articles through the literature search in four different databases: PubMed,  
20  
21 190 Springer link, Web of science and Google scholar. We removed 13 duplicate articles and brought  
22  
23 191 the number of articles to 454. By screening the title and abstract of these articles, we removed 439  
24  
25 192 articles and we considered only 15 in next step (*see* Table SI1). We read the full text of these  
26  
27 193 articles and excluded 11 articles because they did not follow the inclusion criteria. At last, four  
28  
29 194 articles<sup>9,10,14,15</sup> were found to be relevant that contained primary information on the prevalence of  
30  
31 195 substandard, falsified, and unregistered medicines in the Nepali market.

#### 36 196 *Figure 3: Flow chart of research papers search procedure*

38 197 A cross sectional descriptive study reported by Jha et al.<sup>14</sup> assessed the quality of essential  
39  
40 198 medicines available in 62 public health care facilities across 21 districts of Nepal. Out of 244  
41  
42 199 batches of 20 different generics of essential medicines tested, 37 batches failed to meet the required  
43  
44 200 pharmacopeial standards. 62.2% of failed batches of medicines were supplied by Government of  
45  
46 201 Nepal and remaining 37.8% batches were purchased from local resources. The failed medicines  
47  
48 202 included antibiotics, supplements, anti-diabetics etc. Providing required information on the label  
49  
50 203 is another major issue. Most of the 759 pharmaceutical products from 37 Nepali pharmaceutical  
51  
52 204 companies inspected in Chitwan in 2017 missed at least one critical information on the label such  
53  
54  
55  
56  
57  
58  
59  
60

1  
2  
3 205 as drug quantity, name of pharmacopoeia, serial number of pharmaceutical industries, price list,  
4  
5 206 drug classification, and information in Nepali language<sup>9</sup>. In addition, 84% of drugs did not provide  
6  
7 207 the directions of use. Similarly 90% of drug samples (n=40) in Kathmandu did not comply with  
8  
9  
10 208 the existing regulatory requirement on labeling and 42.5% brands did not mention about the  
11  
12 209 pharmacopoeial standard<sup>8</sup>. The same study showed that 40% of domestic and 28% imported brands  
13  
14 210 failed to meet national criteria during laboratory analysis. In average, 32.5% samples were found  
15  
16 211 to be of substandard quality in this study. Another study evaluated the availability and rationality  
17  
18 212 of unregistered fixed-dose drug combinations (FDCs) in Nepal using snowball sampling method  
19  
20 213 and Health Action International Asia-Pacific (HAI-AP) toolkit in 20 retail pharmacies. Forty-one  
21  
22 214 unregistered fixed-dose anti-inflammatory/analgesic/antipyretics drug combinations were found  
23  
24 215 in five major cities of Nepal. Regulatory authorities should initiate strict monitoring and  
25  
26 216 appropriate regulatory mechanisms to prohibit the use of unregistered and irrational FDCs.<sup>10</sup>  
27  
28  
29  
30

## 31 **DISCUSSION**

32 217  
33 218  
34 219 The low quality medicines or related products are recalled from the market by manufacturing  
35  
36 220 company voluntarily or by the order of national or international drug regulatory bodies<sup>16</sup>. Many  
37  
38 221 recall incidents of poor quality medicine have been reported globally<sup>17</sup>. For example, Johnson and  
39  
40 222 Johnson recalled 200,000 bottles of liquid ibuprofen in 2013 due to possible contamination with  
41  
42 223 plastic particles. Similarly, in 2012, the US FDA recalled the contaminated vials of corticosteroid  
43  
44 224 medication which was manufactured by the New England Compounding Center<sup>18</sup>.  
45  
46  
47  
48 225 Our analysis showed that the overall trend of recalled drugs is increasing in Nepal. Starting from  
49  
50 226 a single drug recall in 2010 to highest numbers (123) in 2018. In this year, most of the drugs (90)  
51  
52 227 were recalled since they were not registered with the DDA. This indicates that the circulation of  
53  
54 228 unregistered drugs in market is a serious issue in Nepal which may be contributed by the open  
55  
56  
57  
58  
59  
60

1  
2  
3 229 and unregulated boarder with India. Both allopathic and ayurvedic medicines are widely used in  
4  
5 230 Nepal. The allopathic medicines are the modern medicines that are manufactured synthetically  
6  
7  
8 231 whereas ayurvedic medicines are the traditional medicines which uses the natural remedies to  
9  
10 232 improve health or to treat diseases. Both types of medicines are commercially manufactured in  
11  
12 233 Nepal in addition to be imported mostly from India. There are two groups of manufacturers of  
13  
14 234 ayurvedic drugs in Nepal. They are mostly manufactured by registered companies and sold in  
15  
16 235 market in packages through registered shops. The ayurvedic drugs are also made by individuals or  
17  
18 236 small business holders without being registered at DDA and sell their ayurvedic products in streets,  
19  
20 237 through door-to-door service, and through individual networks. We found that both allopathic and  
21  
22 238 ayurvedic medicines were recalled due to their non-compliance with government standards.  
23  
24 239 Ayurvedic medicines are utilized prominently in Nepali communities, and sometimes, they are  
25  
26 240 used concomitantly with allopathic<sup>19</sup>. There has been an increasing interest in the study of  
27  
28 241 traditional medicine in different parts of world<sup>20</sup>. However, there is still lack of quality research  
29  
30 242 and standards, and stringent regulatory environment in this sector.  
31  
32  
33  
34  
35

36 243 Essential medicines are defined by WHO as the medicines that satisfy the priority healthcare needs  
37  
38 244 of the population<sup>21</sup>. The concept of essential medicines was adopted in 1986 A.D. in Nepal to  
39  
40 245 enhance the access of essential medicines to every individual. The main criteria for selection of  
41  
42 246 the medicines in the National List of Essential Medicine (NLEM) of Nepal are public health  
43  
44 247 relevance, efficacy, safety, cost-effectiveness and access of the drugs. The NLEM 2016 of Nepal  
45  
46 248 contains 359 medicines which has 86 medicines more than the NLEM 2011<sup>11</sup>. Following criteria  
47  
48 249 were used for including a medicine in NLEM: approved and licensed in Nepal, relevance to a  
49  
50 250 disease posing public health problem, proven efficacy and safety, aligned with standard treatment  
51  
52 251 guideline of Nepal, stable under storage conditions, cost-effectiveness, access. However in  
53  
54  
55  
56  
57  
58  
59  
60

1  
2  
3 252 following conditions medicines were excluded from the NLEM list: banned in Nepal, safety  
4  
5 253 concerns, if medicine with higher efficiency, safety profile and lower-cost is available, irrelevant  
6  
7  
8 254 to public health disease burden, antimicrobial resistant, medicine with abuse and misuse  
9  
10 255 potential<sup>11</sup>. Our study showed that some of the recalled allopathic medicines were essential drugs.  
11  
12 256 Jha et.al<sup>14</sup> indicated the presence of high number of substandard essential medicines and majority  
13  
14 257 of which were purchased by Government of Nepal. Essential medicines for various illnesses are  
15  
16 258 supplied free of cost in Nepal through government hospitals, health care centers and health posts.  
17  
18 259 Poor quality of essential medicines can have serious impact on public health. As significant  
19  
20 260 proportion of drugs recalled by DDA included essential medicines distributed by Government of  
21  
22 261 Nepal, there is enough room to improve the procurement procedure and upgrading of health  
23  
24 262 facilities of Nepal that store and distribute the medicines. In one study<sup>22</sup> that looked into the  
25  
26 263 procurement practices in Nepal reported that the majority of hospital pharmacies in Nepal use an  
27  
28 264 expensive direct-procurement model for purchasing medicines. They relied on doctors'  
29  
30 265 prescriptions to choose a particular brand, which may be influenced by pharmaceutical companies'  
31  
32 266 marketing strategies. Most of the hospital pharmacies procured only registered medicines, a  
33  
34 267 minority reported purchasing unregistered medicines through unauthorized supply-chains. Not all  
35  
36 268 pharmacies followed Basel Statements during procurement of medicines. Such pharmacies may  
37  
38 269 need awareness and training to fully adopt regulation of national and international policies for  
39  
40 270 enhancing accessibility to quality medicines.

41  
42 271 Among the recalled groups, antimicrobial group of medicines had the highest frequency of recall  
43  
44 272 incidents. Acharya et.al<sup>23</sup> highlighted the problem of antimicrobial resistance in Nepal as an alarm  
45  
46 273 bell for worse public health situation. Suboptimal dose or poorly manufactured antibiotic medicine  
47  
48 274 increases the chance of antimicrobial resistance<sup>24</sup>. Most of the recalled therapeutic categories of  
49  
50  
51  
52  
53  
54  
55  
56  
57  
58  
59  
60

1  
2  
3 275 medicines like vitamins and minerals, NSAID, antipyretic and analgesic, antiseptic, fluid and  
4  
5 276 electrolyte replenishment and others are over-the-counter medicines that can be brought from the  
6  
7 277 pharmacy without the prescriptions. Such medicines can pose a significant threat to the groups of  
8  
9 278 patients who consume them<sup>25</sup>. Few anti-diabetes medicines were also recalled. Consumption of  
10  
11 279 such medicines may increase the incidence of macrovascular and microvascular complications due  
12  
13 280 to compromised glucose control<sup>26</sup>.

14  
15 281 Our study showed that the drugs were recalled due to failure in various laboratory tests like  
16  
17 282 microbial test, assays, content uniformity test, weight variation, impurity test, dissolution test,  
18  
19 283 friability test, identification and sterility test. Many of these failures might be attributed to the lack  
20  
21 284 of proper quality control during manufacturing and lack of following proper procedures for  
22  
23 285 transportation and storage conditions<sup>13</sup>.

24  
25 286 Jha et.al pointed out that only 13% of 62 health facility inspected followed medicine storage  
26  
27 287 guidelines for light, heat and humidity<sup>14</sup>. Keeping the temperature and humidity within a range is  
28  
29 288 must necessary because it has a major role in degradation of medicines. Another reason was failure  
30  
31 289 to comply with the claim and incorrect labeling. The DDA regulation requires appropriate labeling  
32  
33 290 of marketed medicines to ensure patient medication safety, which seems to be not followed  
34  
35 291 properly. Thus, the drug analyst and the drug regulators should be encouraged to remain vigilant  
36  
37 292 about counterfeiting possibility and conduct the analysis including chemical, physical, package  
38  
39 293 inspection, and authentication efforts to determine quality more accurately<sup>27</sup>.

40  
41 294 Domestically produced and imported medicines in Nepal should have the registration license from  
42  
43 295 DDA<sup>7</sup>. Nonetheless, we found that high numbers of unregistered drugs were recalled during the  
44  
45 296 inspection. The drug supplier, whole seller, and retailers should ensure that the drug is registered  
46  
47 297 within the national regulatory body to timely identify substandard products before they reach  
48  
49  
50  
51  
52  
53  
54  
55  
56  
57



1  
2  
3 298 patients. Also, the regulatory body should stringent post-market surveillance to ameliorate the  
4  
5 299 situation. The unregistered medical products in Nepal may or may not have been registered in  
6  
7  
8 300 India. Since Nepal shares open and poorly regulated boarder with India, drugs registered in India  
9  
10 301 are also easily sold in Nepali market, especially in bordering districts. We found that nearly half  
11  
12 302 of the total recalled medicines were imported from India. India is the leading country in counterfeit  
13  
14 303 drug production, having as much as 35% of the world production originating within its borders<sup>28</sup>.

#### 17 304 **COVID-19 related recalls**

19  
20 305 The COVID-19 pandemic has resulted in the surge of substandard and falsified medical products  
21  
22 306 including drugs, masks, sanitizers, diagnostic tests, and vaccines and other essential medical  
23  
24 307 products<sup>29</sup>. Rampant circulation of fake medical products during emergencies has happened  
25  
26 308 throughout the history<sup>29</sup>. Counterfeit respirators and masks pose additional risk to health care  
27  
28 309 workers<sup>30</sup>. Falsified chloroquine was seized in Cameroon, Congo and Niger during March and  
29  
30 310 May 2020. Chloroquine was controversially announced as the drug for the treatment of COVID-  
31  
32 311 19<sup>31</sup>. The US FDA uncovered nearly 1,300 fraudulent products during early days of COVID-19<sup>32</sup>.  
33  
34 312 The DDA Nepal, recently, has amended the standard for Instant Hand Sanitizer in order to prohibit  
35  
36 313 the selling of the substandard, falsified and unregistered sanitizers<sup>33</sup>. In between September and  
37  
38 314 November 2020, the DDA issued the recalled notice for 19 hand sanitizers which failed to comply  
39  
40 315 with the standard guideline. Some sanitizers were found to contain methanol, rather than ethyl  
41  
42 316 alcohol and isopropyl alcohol. As methanol is very toxic, some of the case series indicated use of  
43  
44 317 hand sanitizer containing methanol causes the transdermal absorption and increases the risk of  
45  
46 318 systemic toxicity<sup>34</sup>. The increase in the demand of hand sanitizer and other medicines has increased  
47  
48 319 the growth of e-commerce. Online sale of pharmaceutical products has just started in Nepal during  
49  
50 320 recent years. WHO has reported that 60% of medications purchased through internet could be  
51  
52  
53  
54  
55  
56  
57  
58  
59  
60

1  
2  
3 321 counterfeit or substandard, and more than 50% of medications purchased online from sites that  
4  
5 322 concealed their actual physical address was found to be low quality medicine<sup>35</sup>. Nepali regulating  
6  
7 323 agencies should pay special attention to this new method of business in Nepal to protect people  
8  
9 324 from the consumption of low-quality and fake medical products. Inexorable growth of online  
10  
11 325 pharmacies, unregulated websites, and, social media platform for business may contribute to the  
12  
13 326 dispensing of unapproved, subpotent, counterfeit, expired or illegal drugs, and prescription drugs  
14  
15 327 without a valid prescription in Nepal too<sup>36</sup>.  
16  
17  
18  
19

## 20 328 **CONCLUSION**

21  
22 329 In this paper, we presented a detailed analysis of low-quality and fake drugs circulating in Nepal  
23  
24 330 in the past decade using recall notice. We showed that the number of recalled drugs has  
25  
26 331 significantly increased. This might be attributed to greater surveillance by DDA or the substandard,  
27  
28 332 falsified and unregistered medicine in the market are actually increasing. Similar to global trend,  
29  
30 333 antimicrobial drugs were the most recalled drugs in Nepal. Since antibiotics are available over the  
31  
32 334 counter in Nepal without doctor's prescription, it is necessary to enforce strict regulation so that  
33  
34 335 the rampant (mis)use of such drugs is minimized and prevent antibiotic resistance. We relied on  
35  
36 336 recall notice from DDA. The recall notice does not provide information on the number of samples  
37  
38 337 collected for testing or inspection and location of sample collection. Therefore, our analysis did  
39  
40 338 not report the rate or prevalence of low-quality drugs. Since sample collection locations were not  
41  
42 339 available, it was not possible to know the most vulnerable districts of Nepal for low-quality drugs.  
43  
44 340 Therefore, a systematic study is needed to understand the prevalence of substandard and falsified  
45  
46 341 drugs in Nepal covering different parts of the country on regular basis. We suggest having more  
47  
48 342 stringent regulatory systems and implementation for pharmaceutical manufacturing industries and  
49  
50 343 post marketing surveillance.  
51  
52  
53  
54  
55  
56  
57  
58  
59  
60

1  
2  
3 344 Contributors: BG contributed to conceptualization and study design, data analysis, manuscript  
4 345 revision. AN, MB contributed to data collection, analysis and first draft. ST contributed to data  
5 346 collection. All authors gave approval for the final version of the manuscript.  
6 347

7  
8 348 Funding: No specific funding supported this.  
9 349

10 350 Competing interests: None declared.  
11 351

12 352 Data sharing: All data are provided in the manuscript and supplementary material. Raw data can  
13 353 be obtained by emailing corresponding author.  
14 354

15  
16 355 Ethical approval: Since this research did not include human subject and used publicly available  
17 356 data, ethical approval was not required.  
18  
19  
20  
21  
22  
23  
24  
25  
26  
27  
28  
29  
30  
31  
32  
33  
34  
35  
36  
37  
38  
39  
40  
41  
42  
43  
44  
45  
46  
47  
48  
49  
50  
51  
52  
53  
54  
55  
56  
57  
58  
59  
60

## 357 **References**

- 358 1. Seiter, A. Health and Economic Consequences of Counterfeit Drugs. *Clin. Pharmacol. Ther.* **85**, 576–578 (2009).
- 359 2. WHO | Pharmaceutical products. *WHO* [http://www.who.int/topics/pharmaceutical\\_products/en/](http://www.who.int/topics/pharmaceutical_products/en/).
- 360 3. Ozawa, S. *et al.* Prevalence and Estimated Economic Burden of Substandard and Falsified Medicines in Low- and Middle-  
361 Income Countries: A Systematic Review and Meta-analysis. *JAMA Netw. Open* **1**, e181662 (2018).
- 362 4. OECD & European Union Intellectual Property Office. *Trade in Counterfeit Pharmaceutical Products*. (OECD, 2020).  
363 doi:10.1787/a7c7e054-en.
- 364 5. Sharma, N., Barstis, T. & Giri, B. Advances in paper-analytical methods for pharmaceutical analysis. *Eur. J. Pharm. Sci.* **111**,  
365 46–56 (2018).
- 366 6. Setopati. Domestic medicine market expanding. <https://en.setopati.com/market/126366/>.
- 367 7. DDA: Drugs Act 2035. <https://www.dda.gov.np/content/drugs-act-2035>.
- 368 8. Gyanwali, P. *et al.* Surveillance of Quality of Medicines Available in the Nepalese Market: A Study from Kathmandu Valley. *J.*  
369 *Nepal Health Res. Counc.* **13**, 233–240 (2015).
- 370 9. Poudel, R. S., Shrestha, S., Thapa, S., Poudel, B. K. & Chhetri, M. Assessment of primary labeling of medicines manufactured  
371 by Nepalese pharmaceutical industries. *J. Pharm. Policy Pract.* **11**, 13 (2018).
- 372 10. Poudel, A., Mohamed Ibrahim, M. I., Mishra, P. & Palaian, S. Assessment of the availability and rationality of unregistered  
373 fixed dose drug combinations in Nepal: a multicenter cross-sectional study. *Glob. Health Res. Policy* **2**, 14 (2017).
- 374 11. DDA: Essential Drug List. <https://www.dda.gov.np/content/essential-drug-list>.
- 375 12. Substandard and falsified medical products. [https://www.who.int/news-room/fact-sheets/detail/substandard-and-falsified-](https://www.who.int/news-room/fact-sheets/detail/substandard-and-falsified-medical-products)  
376 [medical-products](https://www.who.int/news-room/fact-sheets/detail/substandard-and-falsified-medical-products).
- 377 13. WHO | WHO Global Surveillance and Monitoring System for substandard and falsified medical products. *WHO*  
378 <http://www.who.int/medicines/regulation/ssffc/publications/gsms-report-sf/en/>.
- 379 14. Jha, A. K. *et al.* *Quality of essential medicines in public health care facilities of Nepal–2019*. 1–16 [http://nhrc.gov.np/wp-](http://nhrc.gov.np/wp-content/uploads/2020/08/Drug-report.pdf)  
380 [content/uploads/2020/08/Drug-report.pdf](http://nhrc.gov.np/wp-content/uploads/2020/08/Drug-report.pdf) (2019).
- 381 15. Gyanwali, P. *et al.* Surveillance of Quality of Medicines Available in the Nepalese Market: A Study from Kathmandu Valley. *J.*  
382 *Nepal Health Res. Counc.* (2015).
- 383 16. Research, C. for D. E. and. Drug Recalls. *FDA* <https://www.fda.gov/drugs/drug-safety-and-availability/drug-recalls> (2019).
- 384 17. Nagaich, U. & Sadhna, D. Drug recall: An incubus for pharmaceutical companies and most serious drug recall of history. *Int.*  
385 *J. Pharm. Investig.* **5**, 13–19 (2015).

- 1  
2  
3 386 18. Hall, K., Stewart, T., Chang, J. & Freeman, M. K. Characteristics of FDA drug recalls: A 30-month analysis. *Am. J. Health-Syst.*  
4  
5 387 *Pharm. AJHP Off. J. Am. Soc. Health-Syst. Pharm.* **73**, 235–240 (2016).  
6  
7 388 19. Shrestha, S., Danekhu, K., Sapkota, B., Jha, N. & Kc, B. Herbal pharmacovigilance in Nepal: challenges and recommendations.  
8  
9 389 *F1000Research* **9**, 111 (2020).  
10  
11 390 20. WHO. WHO global report on traditional and complementary medicine 2019. [https://www.who.int/publications-detail-](https://www.who.int/publications-detail-redirect/978924151536)  
12 391 [redirect/978924151536](https://www.who.int/publications-detail-redirect/978924151536).  
13  
14 392 21. WHO | Essential medicines. WHO [http://www.who.int/medicines/services/essmedicines\\_def/en/](http://www.who.int/medicines/services/essmedicines_def/en/).  
15  
16 393 22. Shrestha, M., Moles, R., Ranjit, E. & Char, B. Medicine procurement in hospital pharmacies of Nepal: A qualitative study  
17  
18 394 based on the Basel Statements. *PLoS One* **13**, e0191778 (2018).  
19  
20 395 23. Acharya, K. P. & Wilson, R. T. Antimicrobial Resistance in Nepal. *Front. Med.* **6**, 105 (2019).  
21  
22 396 24. Kelesidis, T. & Falagas, M. E. Substandard/counterfeit antimicrobial drugs. *Clin. Microbiol. Rev.* **28**, 443–464 (2015).  
23  
24 397 25. Rojas-Cortés, R. Substandard, falsified and unregistered medicines in Latin America, 2017-2018. *Rev. Panam. Salud Publica*  
25 398 *Pan Am. J. Public Health* **44**, e125 (2020).  
26  
27 399 26. Saraswati, K., Sichanh, C., Newton, P. N. & Caillet, C. Quality of medical products for diabetes management: a systematic  
28  
29 400 review. *BMJ Glob. Health* **4**, e001636 (2019).  
30  
31 401 27. Alghannam, A., Aslanpour, Z., Evans, S. & Schifano, F. A systematic review of counterfeit and substandard medicines in field  
32  
33 402 quality surveys. *Integr. Pharm. Res. Pract.* **3**, 71–88 (2014).  
34  
35 403 28. Wertheimer, A. I. & Santella, T. M. Counterfeit drugs: defining the problem and finding solutions. *Expert Opin. Drug Saf.* **4**,  
36 404 619–622 (2005).  
37  
38 405 29. Newton, P. N. *et al.* COVID-19 and risks to the supply and quality of tests, drugs, and vaccines. *Lancet Glob. Health* **8**, e754–  
39 406 e755 (2020).  
40  
41 407 30. Ippolito, M., Gregoretti, C., Cortegiani, A. & Iozzo, P. Counterfeit filtering facepiece respirators are posing an additional risk  
42  
43 408 to health care workers during COVID-19 pandemic. *Am. J. Infect. Control* **48**, 853–854 (2020).  
44  
45 409 31. Waffo Tchounga, C. A. *et al.* Composition analysis of falsified chloroquine phosphate samples seized during the COVID-19  
46  
47 410 pandemic. *J. Pharm. Biomed. Anal.* **194**, 113761 (2021).  
48  
49 411 32. McMeekin, J. National Consumer Protection Week: FDA Is Vigilant in Protecting Consumers Against COVID-19 Vaccine  
50  
51 412 Scams. *FDA* (2021).  
52  
53 413 33. DDA. DDA: Instant Hand Sanitizer (Alcohol Based) सम्बन्धित त्थ न्त जरुरी सूचना. (2020).  
54  
55  
56  
57  
58  
59  
60

- 1  
2  
3 414 34. Chan, A. P. L. & Chan, T. Y. K. Methanol as an Unlisted Ingredient in Supposedly Alcohol-Based Hand Rub Can Pose Serious  
4  
5 415 Health Risk. *Int. J. Environ. Res. Public. Health* **15**, (2018).  
6  
7 416 35. Ashames, A., Bhandare, R., Zain AlAbdin, S., Alhalabi, T. & Jassem, F. Public Perception toward E-commerce of Medicines  
8  
9 417 and Comparative Pharmaceutical Quality Assessment Study of Two Different Products of Furosemide Tablets from  
10  
11 418 Community and Illicit Online Pharmacies. *J. Pharm. Bioallied Sci.* **11**, 284–291 (2019).  
12  
13 419 36. Fung, C. H., Woo, H. E. & Asch, S. M. Controversies and legal issues of prescribing and dispensing medications using the  
14  
15 420 Internet. *Mayo Clin. Proc.* **79**, 188–194 (2004).  
16  
17 421

For peer review only

1  
2  
3  
4  
5  
6  
7  
8  
9  
10  
11  
12  
13  
14  
15  
16  
17  
18  
19  
20  
21  
22  
23  
24  
25  
26  
27  
28  
29  
30  
31  
32  
33  
34  
35  
36  
37  
38  
39  
40  
41  
42  
43  
44  
45  
46  
47  
48  
49  
50  
51  
52  
53  
54  
55  
56  
57  
58  
59  
60

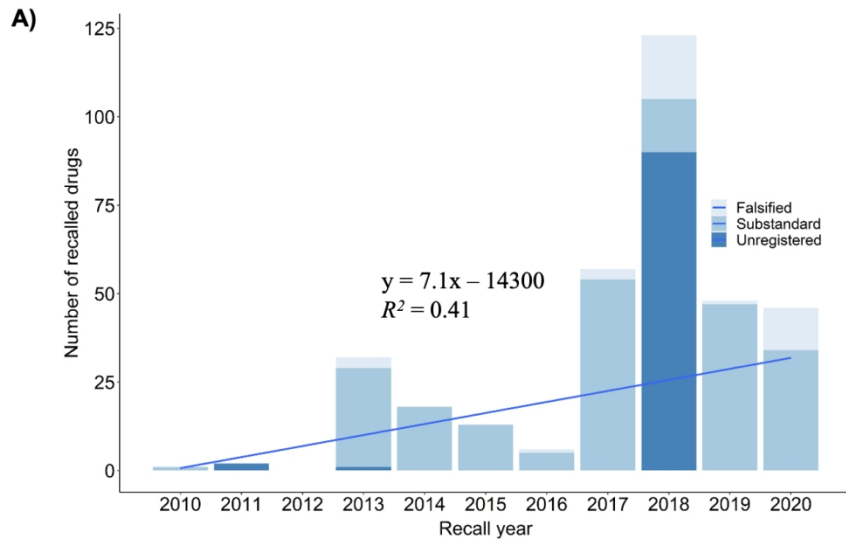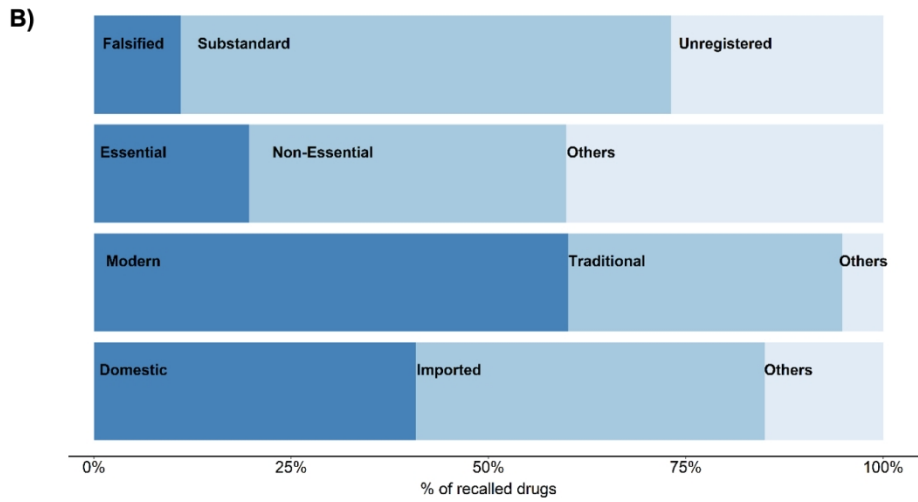

1  
2  
3  
4  
5  
6  
7  
8  
9  
10  
11  
12  
13  
14  
15  
16  
17  
18  
19  
20  
21  
22  
23  
24  
25  
26  
27  
28  
29  
30  
31  
32  
33  
34  
35  
36  
37  
38  
39  
40  
41  
42  
43  
44  
45  
46  
47  
48  
49  
50  
51  
52  
53  
54  
55  
56  
57  
58  
59  
60

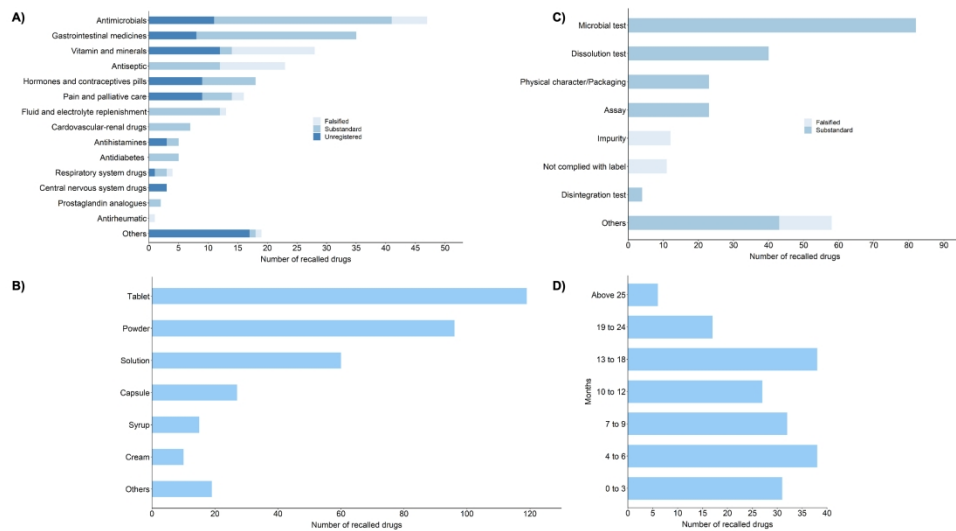



1  
2  
3  
4  
5  
6  
7  
8  
9  
10  
11  
12  
13  
14  
15  
16  
17  
18  
19  
20  
21  
22  
23  
24  
25  
26  
27  
28  
29  
30  
31  
32  
33  
34  
35  
36  
37  
38  
39  
40  
41  
42  
43  
44  
45  
46  
47  
48  
49  
50  
51  
52  
53  
54  
55  
56  
57  
58  
59  
60

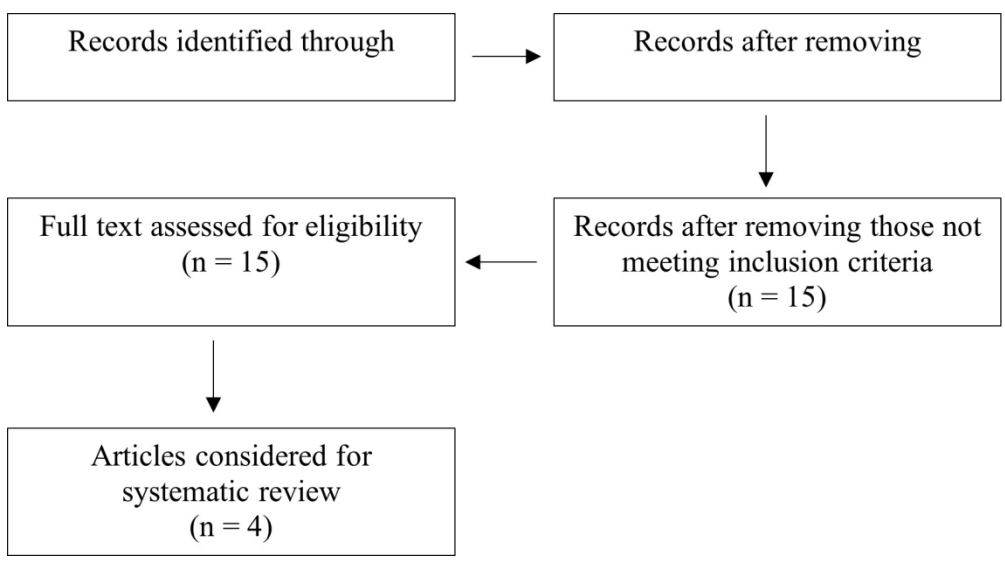

138x75mm (330 x 330 DPI)

# Incidences of poor-quality pharmaceutical products in Nepal

Astha Neupane, Maheshwor Bastakoti, Sabita Tamang, Basant Giri\*

Center for Analytical Sciences, Kathmandu Institute of Applied Sciences, P. O. Box 23002,  
Kathmandu, Nepal

## Supplementary Material

Table SI1: Result of literature search of peer-reviewed documents reporting drug quality data

| Keywords                                                                                                     | Number of articles found |                |                        |                   |
|--------------------------------------------------------------------------------------------------------------|--------------------------|----------------|------------------------|-------------------|
|                                                                                                              | PubMed                   | Web<br>Science | of<br>Springer<br>link | Google<br>Scholar |
| Counterfeit* OR substandard* OR fake<br>OR spurious OR unregulated OR<br>unregistered OR falsified* OR fraud | 14532                    | 51113          | 71770                  | 41100             |
| Drug OR medicine OR pharmaceutical                                                                           | 4977168                  | 4579007        | 1386455                | 728000            |
| Nepal*                                                                                                       | 12868                    | 18132          | 16862                  | 26500             |
| 1 AND 2 AND 3                                                                                                | 13                       | 10             | 393                    | 51                |

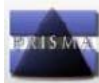

## PRISMA 2020 Checklist

| Section and Topic             | Item # | Checklist item                                                                                                                                                                                                                                                                                       | Location where item is reported |
|-------------------------------|--------|------------------------------------------------------------------------------------------------------------------------------------------------------------------------------------------------------------------------------------------------------------------------------------------------------|---------------------------------|
| <b>TITLE</b>                  |        |                                                                                                                                                                                                                                                                                                      |                                 |
| Title                         | 1      | Identify the report as a systematic review.                                                                                                                                                                                                                                                          | -                               |
| <b>ABSTRACT</b>               |        |                                                                                                                                                                                                                                                                                                      |                                 |
| Abstract                      | 2      | See the PRISMA 2020 for Abstracts checklist.                                                                                                                                                                                                                                                         | Page 2                          |
| <b>INTRODUCTION</b>           |        |                                                                                                                                                                                                                                                                                                      |                                 |
| Rationale                     | 3      | Describe the rationale for the review in the context of existing knowledge.                                                                                                                                                                                                                          | Page 4                          |
| Objectives                    | 4      | Provide an explicit statement of the objective(s) or question(s) the review addresses.                                                                                                                                                                                                               | Page 5                          |
| <b>METHODS</b>                |        |                                                                                                                                                                                                                                                                                                      |                                 |
| Eligibility criteria          | 5      | Specify the inclusion and exclusion criteria for the review and how studies were grouped for the syntheses.                                                                                                                                                                                          | Page 6                          |
| Information sources           | 6      | Specify all databases, registers, websites, organisations, reference lists and other sources searched or consulted to identify studies. Specify the date when each source was last searched or consulted.                                                                                            | Page 5&6                        |
| Search strategy               | 7      | Present the full search strategies for all databases, registers and websites, including any filters and limits used.                                                                                                                                                                                 | Page 6                          |
| Selection process             | 8      | Specify the methods used to decide whether a study met the inclusion criteria of the review, including how many reviewers screened each record and each report retrieved, whether they worked independently, and if applicable, details of automation tools used in the process.                     | Page 5&6                        |
| Data collection process       | 9      | Specify the methods used to collect data from reports, including how many reviewers collected data from each report, whether they worked independently, any processes for obtaining or confirming data from study investigators, and if applicable, details of automation tools used in the process. | Page 5&6                        |
| Data items                    | 10a    | List and define all outcomes for which data were sought. Specify whether all results that were compatible with each outcome domain in each study were sought (e.g. for all measures, time points, analyses), and if not, the methods used to decide which results to collect.                        | -                               |
|                               | 10b    | List and define all other variables for which data were sought (e.g. participant and intervention characteristics, funding sources). Describe any assumptions made about any missing or unclear information.                                                                                         | -                               |
| Study risk of bias assessment | 11     | Specify the methods used to assess risk of bias in the included studies, including details of the tool(s) used, how many reviewers assessed each study and whether they worked independently, and if applicable, details of automation tools used in the process.                                    | -                               |
| Effect measures               | 12     | Specify for each outcome the effect measure(s) (e.g. risk ratio, mean difference) used in the synthesis or presentation of results.                                                                                                                                                                  | -                               |
| Synthesis methods             | 13a    | Describe the processes used to decide which studies were eligible for each synthesis (e.g. tabulating the study intervention characteristics and comparing against the planned groups for each synthesis (item #5)).                                                                                 | Page 6                          |
|                               | 13b    | Describe any methods required to prepare the data for presentation or synthesis, such as handling of missing summary statistics, or data conversions.                                                                                                                                                | Page 7                          |
|                               | 13c    | Describe any methods used to tabulate or visually display results of individual studies and syntheses.                                                                                                                                                                                               | Page 7                          |
|                               | 13d    | Describe any methods used to synthesize results and provide a rationale for the choice(s). If meta-analysis was performed, describe the model(s), method(s) to identify the presence and extent of statistical heterogeneity, and software package(s) used.                                          | Page 7                          |
|                               | 13e    | Describe any methods used to explore possible causes of heterogeneity among study results (e.g. subgroup analysis, meta-regression).                                                                                                                                                                 | -                               |
|                               | 13f    | Describe any sensitivity analyses conducted to assess robustness of the synthesized results.                                                                                                                                                                                                         | -                               |
| Reporting bias assessment     | 14     | Describe any methods used to assess risk of bias due to missing results in a synthesis (arising from reporting biases).                                                                                                                                                                              | -                               |
| Certainty                     | 15     | Describe any methods used to assess certainty (or confidence) in the body of evidence for an outcome.                                                                                                                                                                                                | -                               |

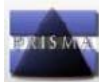

## PRISMA 2020 Checklist

| Section and Topic              | Item # | Checklist item                                                                                                                                                                                                                                                                                                                                   | Location where item is reported |
|--------------------------------|--------|--------------------------------------------------------------------------------------------------------------------------------------------------------------------------------------------------------------------------------------------------------------------------------------------------------------------------------------------------|---------------------------------|
| assessment                     |        |                                                                                                                                                                                                                                                                                                                                                  |                                 |
| <b>RESULTS</b>                 |        |                                                                                                                                                                                                                                                                                                                                                  |                                 |
| Study selection                | 16a    | Describe the results of the search and selection process, from the number of records identified in the search to the number of studies included in the review, ideally using a flow diagram.                                                                                                                                                     | Page 7&9                        |
|                                | 16b    | Cite studies that might appear to meet the inclusion criteria, but which were excluded, and explain why they were excluded.                                                                                                                                                                                                                      | Page 9                          |
| Study characteristics          | 17     | Cite each included study and present its characteristics.                                                                                                                                                                                                                                                                                        | Page 7                          |
| Risk of bias in studies        | 18     | Present assessments of risk of bias for each included study.                                                                                                                                                                                                                                                                                     | Page 16                         |
| Results of individual studies  | 19     | For all outcomes, present, for each study: (a) summary statistics for each group (where appropriate) and (b) an effect estimate and its precision (e.g. confidence/credible interval), ideally using structured tables or plots.                                                                                                                 | Page 7-9                        |
| Results of syntheses           | 20a    | For each synthesis, briefly summarise the characteristics and risk of bias among contributing studies.                                                                                                                                                                                                                                           | -                               |
|                                | 20b    | Present results of all statistical syntheses conducted. If meta-analysis was done, present for each the summary estimate and its precision (e.g. confidence/credible interval) and measures of statistical heterogeneity. If comparing groups, describe the direction of the effect.                                                             | Page 7-9                        |
|                                | 20c    | Present results of all investigations of possible causes of heterogeneity among study results.                                                                                                                                                                                                                                                   | -                               |
|                                | 20d    | Present results of all sensitivity analyses conducted to assess the robustness of the synthesized results.                                                                                                                                                                                                                                       | -                               |
| Reporting biases               | 21     | Present assessments of risk of bias due to missing results (arising from reporting biases) for each synthesis assessed.                                                                                                                                                                                                                          | -                               |
| Certainty of evidence          | 22     | Present assessments of certainty (or confidence) in the body of evidence for each outcome assessed.                                                                                                                                                                                                                                              | -                               |
| <b>DISCUSSION</b>              |        |                                                                                                                                                                                                                                                                                                                                                  |                                 |
| Discussion                     | 23a    | Provide a general interpretation of the results in the context of other evidence.                                                                                                                                                                                                                                                                | Page 11-15                      |
|                                | 23b    | Discuss any limitations of the evidence included in the review.                                                                                                                                                                                                                                                                                  | Page 16                         |
|                                | 23c    | Discuss any limitations of the review processes used.                                                                                                                                                                                                                                                                                            | Page 16                         |
|                                | 23d    | Discuss implications of the results for practice, policy, and future research.                                                                                                                                                                                                                                                                   | Page 15&16                      |
| <b>OTHER INFORMATION</b>       |        |                                                                                                                                                                                                                                                                                                                                                  |                                 |
| Registration and protocol      | 24a    | Provide registration information for the review, including register name and registration number, or state that the review was not registered.                                                                                                                                                                                                   | Not registered                  |
|                                | 24b    | Indicate where the review protocol can be accessed, or state that a protocol was not prepared.                                                                                                                                                                                                                                                   | Not prepared                    |
|                                | 24c    | Describe and explain any amendments to information provided at registration or in the protocol.                                                                                                                                                                                                                                                  | -                               |
| Support                        | 25     | Describe sources of financial or non-financial support for the review, and the role of the funders or sponsors in the review.                                                                                                                                                                                                                    | None                            |
| Competing interests            | 26     | Declare any competing interests of review authors.                                                                                                                                                                                                                                                                                               | None                            |
| Availability of data, code and | 27     | Report which of the following are publicly available and where they can be found: template data collection forms; data extracted from included studies; data used for all analyses, analytic code; any other materials used in the review. <a href="https://www.bmj.com/submit/guidelines.xhtml">https://www.bmj.com/submit/guidelines.xhtml</a> | Data used for analysis          |

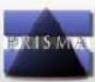

# PRISMA 2020 Checklist

1  
2  
3  
4  
5  
6  
7  
8  
9  
10  
11  
12  
13  
14  
15  
16  
17  
18  
19  
20  
21  
22  
23  
24  
25  
26  
27  
28  
29  
30  
31  
32  
33  
34  
35  
36  
37  
38  
39  
40  
41  
42  
43  
44  
45  
46  
47

| Section and Topic | Item # | Checklist item | Location where item is reported |
|-------------------|--------|----------------|---------------------------------|
| other materials   |        |                |                                 |

From: Page MJ, McKenzie JE, Bossuyt PM, Boutron I, Hoffmann TC, Mulrow CD, et al. The PRISMA 2020 statement: an updated guideline for reporting systematic reviews. *BMJ* 2021;372:n71. doi: 10.1136/bmj.n71  
 For more information, visit: <http://www.prisma-statement.org/>

For peer review only

# BMJ Open

## Pattern of drug recalls and quality of pharmaceutical products in Nepal

|                                 |                                                                                                                                                                                                                                                                                                                                                                              |
|---------------------------------|------------------------------------------------------------------------------------------------------------------------------------------------------------------------------------------------------------------------------------------------------------------------------------------------------------------------------------------------------------------------------|
| Journal:                        | <i>BMJ Open</i>                                                                                                                                                                                                                                                                                                                                                              |
| Manuscript ID                   | bmjopen-2021-053479.R1                                                                                                                                                                                                                                                                                                                                                       |
| Article Type:                   | Original research                                                                                                                                                                                                                                                                                                                                                            |
| Date Submitted by the Author:   | 23-Oct-2021                                                                                                                                                                                                                                                                                                                                                                  |
| Complete List of Authors:       | Neupane, Astha; Kathmandu Institute of Applied Sciences, Center for Analytical Sciences<br>Bastakoti, Maheshwor; Kathmandu Institute of Applied Sciences, Center for Analytical Sciences<br>Tamang, Sabita; Kathmandu Institute of Applied Sciences, Center for Analytical Sciences<br>Giri, Basant; Kathmandu Institute of Applied Sciences, Center for Analytical Sciences |
| <b>Primary Subject Heading</b>: | Public health                                                                                                                                                                                                                                                                                                                                                                |
| Secondary Subject Heading:      | Global health, Health policy, Pharmacology and therapeutics                                                                                                                                                                                                                                                                                                                  |
| Keywords:                       | Public health < INFECTIOUS DISEASES, COVID-19, Health economics < HEALTH SERVICES ADMINISTRATION & MANAGEMENT                                                                                                                                                                                                                                                                |
|                                 |                                                                                                                                                                                                                                                                                                                                                                              |

SCHOLARONE™  
Manuscripts



I, the Submitting Author has the right to grant and does grant on behalf of all authors of the Work (as defined in the below author licence), an exclusive licence and/or a non-exclusive licence for contributions from authors who are: i) UK Crown employees; ii) where BMJ has agreed a CC-BY licence shall apply, and/or iii) in accordance with the terms applicable for US Federal Government officers or employees acting as part of their official duties; on a worldwide, perpetual, irrevocable, royalty-free basis to BMJ Publishing Group Ltd ("BMJ") its licensees and where the relevant Journal is co-owned by BMJ to the co-owners of the Journal, to publish the Work in this journal and any other BMJ products and to exploit all rights, as set out in our [licence](#).

The Submitting Author accepts and understands that any supply made under these terms is made by BMJ to the Submitting Author unless you are acting as an employee on behalf of your employer or a postgraduate student of an affiliated institution which is paying any applicable article publishing charge ("APC") for Open Access articles. Where the Submitting Author wishes to make the Work available on an Open Access basis (and intends to pay the relevant APC), the terms of reuse of such Open Access shall be governed by a Creative Commons licence – details of these licences and which [Creative Commons](#) licence will apply to this Work are set out in our licence referred to above.

Other than as permitted in any relevant BMJ Author's Self Archiving Policies, I confirm this Work has not been accepted for publication elsewhere, is not being considered for publication elsewhere and does not duplicate material already published. I confirm all authors consent to publication of this Work and authorise the granting of this licence.

# 1 **Pattern of drug recalls and quality of pharmaceutical products in**

## 2 **Nepal**

3 Astha Neupane, Maheshwor Bastakoti, Sabita Tamang, Basant Giri\*

4 Center for Analytical Sciences, Kathmandu Institute of Applied Sciences

5 P. O. Box 23002, Kathmandu, Nepal

6  
7  
8  
9 \*Correspondence

10 Dr. Basant Giri

11 Center for Analytical Sciences, Kathmandu Institute of Applied Sciences

12 PO BOX 23003, Kathmandu, Nepal

13 bgiri@kias.org.np, chembasant@gmail.com

14  
15  
16 **Word count:** 3702 excluding abstract and references



## 26 ABSTRACT

27 **Objectives:** To evaluate the pattern of substandard and falsified pharmaceutical products using  
28 drug recall notices and via a systematic review in Nepal.

29 **Setting:** We analyzed drug recall notices issued by the Department of Drug Administration  
30 (DDA), Nepal and systematically reviewed peer reviewed research articles during January 2010  
31 – December 2020.

32 **Participants:** This study did not include human participants. However, data was collected from  
33 72 drug recall notices issued by DDA and four research papers.

34 **Results:** A total of 346 pharmaceutical products were recalled during the reported period. The  
35 number of recalled pharmaceutical products has increased significantly over the past decade in  
36 Nepal. The most frequently recalled drugs were antimicrobials followed by gastrointestinal  
37 medicines, vitamins and supplements, pain and palliative medicines among others. Number of  
38 imported recalled drugs were slightly higher (42.2%) than domestic recalled drugs (40.7%).  
39 Sixty-two percentage of recalled drugs were substandard, 11% were falsified and remaining 27%  
40 were not registered at the DDA. Similarly, higher number of modern drugs (62%) were recalled  
41 than traditional ones (35%). Hand sanitizers used to minimize COVID-19 transmission  
42 contributed significantly to the list of recalled pharmaceutical products in 2020. Most of these  
43 sanitizers contained significant amounts of methanol (as high as 75%v/v) instead of appropriate  
44 amount of ethyl or isopropyl alcohol. The peer-reviewed research papers reported issues with  
45 labelling, unregistered drugs and drugs failed in several laboratory testing.

46 **Conclusion:** Our analysis showed that number of recalls of substandard and fake drugs are  
47 increasing in Nepal. Since the recall data in this paper did not include number of samples tested

1  
2  
3 48 and location of samples collected, more studies to understand the prevalence of substandard and  
4  
5 49 falsified drugs in Nepal is recommended.  
6  
7

8 50 **Keywords:** Counterfeit drugs, falsified medical products, public health, substandard, fake drugs  
9

#### 10 **Strength and imitations of this study**

- 11 • This is the first study to evaluate the pattern of drug recall in Nepal.
- 12 • A comprehensive analysis of drug recall notice issued by Department of Drug  
13 Administration, Nepal from January 2010 to December 2020.
- 14 • Also includes a systematic review of peer-reviewed publications from 2010 to  
15 2020 which reported poor quality drugs in Nepal.
- 16 • It does not include number of samples tested, location of sample collected, and  
17 impact of recall notice.
- 18 • Since we looked at pattern of recall drugs, it did not report the rate of low-quality  
19 drugs over the last decade.  
20  
21  
22  
23  
24

25 51  
26  
27 52 **INTRODUCTION**  
28  
29  
30 53 Pharmaceutical products are essential to treat, prevent, and save lives of millions of people  
31  
32 54 globally<sup>1</sup>. They should be safe, effective, and of good quality. Such products should be prescribed  
33  
34 55 by authorized medical practitioner and used rationally<sup>2</sup>. However, pharmaceutical products that do  
35  
36 56 not meet regulatory standards and quality threaten the health of the population of today and future.  
37  
38 57 Such products may be substandard or low-quality or falsified. Substandard or falsified drugs could  
39  
40 58 lead to drug resistance and put the lives of patients at risk in addition to increasing the economic  
41  
42 59 and social burden on people<sup>3</sup>. There are several reasons for the circulation of such substandard and  
43  
44 60 falsified products in market such as lack of access to affordable, quality, safe and effective medical  
45  
46 61 products and good governance as well as poor ethical practices in health care facilities and  
47  
48 62 medicine outlets. Limited technical capacity in manufacturing, quality control, distribution and  
49  
50 63 testing also contribute to this problem<sup>4,5</sup>.  
51  
52  
53  
54  
55

56 64 Ozawa et al. in a 2018 meta-analysis estimated that about 10.5% of the medicines worldwide are  
57  
58  
59  
60

1  
2  
3 65 either substandard or falsified. Prevalence of low-quality pharmaceutical products is higher in low-  
4  
5 66 and middle-income countries (13.6%) compared to high income countries. About 18.7% medicines  
6  
7 67 have been estimated to be low-quality in Africa and 13.7% in Asia. The most substandard or  
8  
9  
10 68 falsified drugs are the antimalarials (19.1%)<sup>3</sup>.

11  
12  
13 69 Nepal is one of the least developed countries<sup>6</sup> that shares open and poorly regulated borders with  
14  
15 70 India and China. These two countries are considered as the major producers of low-quality and  
16  
17 71 fake pharmaceutical products circulating in the global market<sup>4</sup>. The domestic market for medical  
18  
19 72 products in Nepal was estimated to be 70 billion Nepal rupees in 2019 which included drugs (36  
20  
21 73 billion), raw materials and surgical equipment<sup>7</sup>. The Department of Drug Administration (DDA)  
22  
23 74 authorizes the distribution of all pharmaceutical products in Nepal including production,  
24  
25 75 distribution, export and import. The DDA in Nepal is equivalent to the U.S. FDA and is responsible  
26  
27 76 to prevent the misuse or abuse of drugs and allied pharmaceutical substances<sup>8</sup>. Few studies in the  
28  
29 77 past have indicated the circulation of substandard, counterfeit, and unregistered drugs in the Nepali  
30  
31 78 market<sup>9,10,11</sup>. DDA Nepal recalls marketed drugs if the drugs do not fulfill any requirement as  
32  
33 79 indicated in the drug act 2035 B.S.<sup>8</sup>. It then issues public alerts and warnings when substandard,  
34  
35 80 falsified, and unregistered medicine incidents are detected.

36  
37  
38  
39  
40  
41 81 It is important to understand major issues responsible for the availability of poor-quality drugs in  
42  
43 82 the market. Analysis of pattern of drug alerts, regulatory recalls and company led recalls could be  
44  
45 83 helpful to devise actions to mitigate the issues related to poor-quality drugs<sup>12</sup>. In this study, we  
46  
47 84 report the pattern of recall of poor-quality drugs in Nepal by analyzing drug recall notice issued  
48  
49 85 by the DDA. We analyzed temporal trend of low-quality drugs, types of drugs and formulations,  
50  
51 86 origin of drugs & manufacturers and reasoning for recall. We also reviewed research publications  
52  
53 87 that reported drug quality data.

## 88 **METHODOLOGY**

89 We analyzed drug recall notices published by DDA Nepal from January 2010 to December 2020.

90 The DDA publishes such notices in its bulletins, websites, and newspapers (<https://dda.gov.np/>).

91 We extracted all the information provided on the recall notice such as brand name, dosage form,

92 batch number, manufacturing date, expiry date, recall date, reason for non-compliance, and the

93 manufacturer information. We used National List of Essential Medicines 2016 of Nepal to classify

94 the recalled drugs into essential and non-essential drugs<sup>13</sup> and the WHO definition to identify

95 substandard, falsified and unregistered drugs<sup>14</sup>. According to WHO definition, substandard drugs

96 are authorized medical products but fail to meet quality standards or specifications or both.

97 Similarly, falsified drugs are medical products that misrepresent their identity, composition or

98 source<sup>15</sup>. Pharmaceutical products that did not pass dissolution test, active pharmaceutical

99 ingredient (API) assay, microbial test, leakage test, friability, were non-compliance with the

100 pharmacopeia for physical appearance, fungal count, weight variation, particulate matter test,

101 uniformity test, disintegration test, and pH test were put together under the substandard category.

102 Similarly, drugs that contained impurities, active ingredient not meant to be there, had price sticker

103 without approval, or did not have product specification were classified as falsified pharmaceutical

104 products. The drugs that were recalled as being not registered at DDA Nepal were classified under

105 unregistered category. Unregistered drugs do not undergo evaluation and/or approval by DDA

106 Nepal. Based on the brand names of each non-ayurvedic pharmaceutical product, we identified

107 their generic names and then categorized them into different groups based on their therapeutic

108 properties.

109 In addition to the recall notice, we systematically reviewed the published research works to find

110 the reporting of low-quality drugs in Nepali market. We specifically searched peer reviewed

1  
2  
3 111 research articles from electronic databases such as PubMed (2010-2020), Web of Science (2010-  
4  
5 112 2020), Springer link (2010-2020), and Google Scholar (2010-2020). We used the following search  
6  
7 113 terms in conjunction with Boolean search term (“OR”, “AND”) to identify related articles:  
8  
9 114 “counterfeit\*”, “substandard\*”, “falsified\*”, “fake”, “spurious”, “unregulated drugs”,  
10  
11 “unregistered”, or “frauds”; combined with “drug”, “medicine”, or “pharmaceutical”; “Nepal\*”.  
12  
13 115  
14 116 In Google Scholar same search terms were used, but instead of “Nepal\*”, we used “intitle:Nepal”.  
15  
16 117 The articles were screened and evaluated manually through the title and abstract based on inclusion  
17  
18 118 criteria: date of publication (2010-2020), the language (English) in which the article was published,  
19  
20 119 the article should contain data/information on the prevalence of  
21  
22 120 falsified/spurious/counterfeit/substandard drugs and the location of experiment/research carried  
23  
24 121 out. Articles that did not meet the inclusion criteria were excluded. Also excluded were opinion  
25  
26 122 articles, letters, notes, conference papers, book chapters, editorials or comments or articles with no  
27  
28 123 abstracts or articles with counterfeit or substandard medicines related to animals.  
29  
30  
31  
32  
33 124 A flow chart of search procedure is given in figure 1. Initially, we identified 467 journal articles  
34  
35 125 after a search of literature in four different databases: PubMed, Springer link, Web of science and  
36  
37 126 Google scholar. We removed 13 duplicate articles and brought the number of articles to 454. By  
38  
39 127 screening the title and abstract of these articles, we removed 439 articles and we considered only  
40  
41 128 15 in next step (*see* Table S11 in supplementary information). We read the full text of these articles  
42  
43 129 and excluded 11 articles because they did not follow the inclusion criteria. At last, four  
44  
45 130 articles<sup>10,11,16,17</sup> were found to be relevant that contained primary information on the prevalence of  
46  
47 131 substandard, falsified, and unregistered medicines in the Nepali market.  
48  
49  
50  
51

52 132 *Figure 1: Flow chart of research papers search procedure*  
53  
54  
55  
56  
57  
58  
59  
60

1  
2  
3 133 Statistical analyses of data such as Chi-square test, Fisher exact test and simple linear regression  
4  
5 134 were performed using R version 1.4.1106.  
6  
7

8 135 Patients and public involvement: Patient or the public were not involved in the design, conduct,  
9  
10 136 reporting, and dissemination plans for this study.  
11  
12

## 13 14 137 **RESULTS**

15 138  
16 139 We analyzed recalled drugs during the period of 2010 – 2020. During this period 346  
17  
18 140 pharmaceutical products were recalled by DDA Nepal. The number of recalled low-quality drugs  
19  
20 141 in Nepal has significantly increased in the last decade (Figure 2A, linear regression,  $p$ -value < 0.05,  
21  
22 142 adjusted R-squared value = 0.335). We found that only one pharmaceutical product was recalled in  
23  
24 143 2010. The product was a lactate solution which is commonly used for fluid resuscitation. The  
25  
26 144 solution was recalled from the Nepali market because it did not pass the sterility test. There was  
27  
28 145 no recall in 2012. The year 2018 had the highest number of pharmaceutical products recalled (123  
29  
30 146 products, see Figure 2A). Forty-six products were recalled in the year 2020, majority of which  
31  
32 147 were hand sanitizers. The recalled pharmaceutical products were from 96 manufacturers mostly  
33  
34 148 from Nepal and India, few from Australia, Bangladesh, and China. Manufacturer of 91 recalled  
35  
36 149 drugs were unknown. The recalled pharmaceutical products included a significantly (two-sided  
37  
38 150 Fisher exact test,  $p$ -value < 0.001) higher number of imported medicines (153) items than  
39  
40 151 domestically manufactured ones (141). The imported recalled products were manufactured mostly  
41  
42 152 in India (97%, Figure 2B) and in drugs from Australia, Bangladesh and China. Country of origin  
43  
44 153 of 52 recalled pharmaceutical products were not identified.  
45  
46  
47  
48  
49

50  
51 154 **Figure 2:** (A) Temporal trend of recalled pharmaceutical products in Nepal. (B) Contribution of  
52  
53 155 different categories of pharmaceutical products in the recall list.  
54  
55  
56  
57  
58  
59  
60

1  
2  
3 156 Sixty percentage (n=346) of recalled pharmaceutical products were modern or allopathic (208)  
4  
5 157 and 35% were traditional or ayurvedic (120) (Figure 2B). Two-sided Fisher exact test showed that  
6  
7 158 significantly higher number of modern pharmaceutical products were recalled (p-value < 0.001).  
8  
9  
10 159 Twenty-seven percentage of the recalled drugs were unregistered at the DDA indicating they were  
11  
12 160 not authorized to be distributed and sold in Nepal. Similarly, twenty percentage of the recalled  
13  
14 161 drugs, mostly allopathic, were listed as essential medicines. 40% of the recalled drugs were non-  
15  
16 162 essential allopathic (p-value < 0.001) and 40% were ayurvedic drugs. Essential medicines are  
17  
18 163 distributed free of cost through government health centers<sup>13</sup> and only allopathic drugs are listed as  
19  
20 164 essential ones. Majority of the recalled pharmaceutical products were substandard (62%) followed  
21  
22 165 by unregistered (27%) and falsified (11%) (see Figure 2B). We found that the recall pattern among  
23  
24 166 these three categories were significantly different (one-way chi-square test, p-value < 0.001,  $\chi^2 =$   
25  
26 167 142.31, df = 2).  
27  
28  
29

30  
31 168 **Figure 3:** (A) Categories of recalled drugs based on their therapeutics, (B) Types of dosage  
32  
33 169 forms of recalled drugs, (C) Major reasons for recalling the pharmaceutical products, (D) Self  
34  
35 170 life of recalled pharmaceutical products after the recall (in months).  
36  
37

38 171 The top 10 most recalled drugs were antimicrobials (13.6%) followed by gastrointestinal  
39  
40 172 medicines (10.1%), vitamins and minerals (8.1%), antiseptic (6.6), hormones and contraceptives  
41  
42 173 (5.2%), and pain and palliative care medicines (4.6), fluid and electrolyte replenishment items  
43  
44 174 (3.7%), cardiovascular and renal drugs (2.0%), anti-diabetes (1.4%) and antihistamines (1.4%)  
45  
46 175 (see Figure 3A). Remaining recalled drugs were CNS drugs, respiratory system drugs,  
47  
48 176 prostaglandin analogues, and antirheumatic agents. Nineteen drugs were not classified into any of  
49  
50 177 those and labelled as “others” because sufficient information was not available. Ayurvedic drugs  
51  
52 178 were not included in this categorization.  
53  
54  
55  
56  
57  
58  
59  
60

1  
2  
3 179 The DDA provided reason(s) for every recalled pharmaceutical product. Large number of drugs  
4  
5 180 (26.8%) were recalled because they were not registered at DDA. The most common reason for  
6  
7  
8 181 recall among registered drugs was the failure to comply with microbial test (23.7%) followed by  
9  
10 182 failures in dissolution test (11.5%), in quantitative assay for active pharmaceutical ingredient  
11  
12 183 (6.6%), and in physical characteristics and packaging (6.6%). Eleven products did not comply with  
13  
14 184 labelling requirements and 12 had one or more impurities. Few samples categorized as “others”  
15  
16 185 were recalled due to failure in identification test and contained active ingredient in dietary  
17  
18 186 supplements (see Figure 3B). Tablets were the most recalled dosage forms followed by powder,  
19  
20 187 solution, capsules, syrups/suspension, and cream/ointment. Dosage forms of some products were  
21  
22 188 not identifiable, and they are categorized as “others” (Figure 3C). The shelf-life of recalled drugs  
23  
24 189 ranged from less than three months (16.4%) to more than two years at the time of recall (Figure  
25  
26 190 2D).

### 31 191 **Low-quality drugs reported in research papers**

32  
33  
34 192 As stated in method section, only four research articles were included for detailed analysis. One  
35  
36 193 of these articles reported by Jha et al.<sup>16</sup> assessed the quality of essential medicines available in 62  
37  
38 194 public health care facilities across 21 districts of Nepal. The authors tested 244 batches of 20  
39  
40 195 different generics of essential medicines and found that 37 batches failed to meet the required  
41  
42 196 pharmacopeial standards. The quality failed medicines included both supplied by Government of  
43  
44 197 Nepal (62.2%) and purchased from local pharmacies (37.8%). The failed medicines included  
45  
46 198 antibiotics, supplements, anti-diabetics etc.

47  
48  
49  
50 199 Providing required information on the label is another major issue. Most of the 759 pharmaceutical  
51  
52 200 products from 37 Nepali pharmaceutical companies inspected in Chitwan in 2017 missed at least  
53  
54 201 one critical information on the label such as drug quantity, name of pharmacopoeia, serial number



1  
2  
3 202 of pharmaceutical industries, price list, drug classification, and information in Nepali language<sup>10</sup>.  
4  
5 203 The reports showed that labels of 84% of drugs did not provide the directions for use. Similarly  
6  
7 204 90% of drug samples (n=40) in Kathmandu did not comply with the existing regulatory  
8  
9 205 requirement on labeling and 42.5% brands did not indicate the Pharmacopoeial standard<sup>9</sup>. The  
10  
11 206 same study showed that 40% of domestic and 28% imported brands failed to meet national criteria  
12  
13 207 during laboratory analysis. On average, 32.5% samples were found to be of substandard quality in  
14  
15 208 this study. Another study evaluated the availability and rationality of unregistered fixed-dose drug  
16  
17 209 combinations (FDCs) in Nepal using snowball sampling method and Health Action International  
18  
19 210 Asia-Pacific (HAI-AP) toolkit in 20 retail pharmacies. Forty-one unregistered fixed-dose anti-  
20  
21 211 inflammatory/analgesic/antipyretics drug combinations were found in five major cities of Nepal.  
22  
23 212 Regulatory authorities should initiate strict monitoring and appropriate regulatory mechanisms to  
24  
25 213 prohibit the use of unregistered and irrational FDCs.<sup>11</sup>  
26  
27  
28  
29  
30  
31

## 32 214 **DISCUSSION**

33 215  
34 216 Low-quality medicines or related products are recalled from the market by manufacturing  
35  
36 217 companies voluntarily or by the order of national or international drug regulatory bodies<sup>18</sup>. Many  
37  
38 218 recall incidents of poor quality medicine have been reported globally<sup>19</sup>. For example, Johnson and  
39  
40 219 Johnson recalled 200,000 bottles of liquid ibuprofen in 2013 due to possible contamination with  
41  
42 220 plastic particles. Similarly, in 2012, the US FDA recalled the contaminated vials of corticosteroid  
43  
44 221 medication which was manufactured by the New England Compounding Center<sup>20</sup>.  
45  
46  
47  
48 222 Our analysis showed that the overall trend of recalled drugs is increasing in Nepal. Starting from  
49  
50 223 a single drug recall in 2010 to highest numbers (123) in 2018. In this year, most of the recalled  
51  
52 224 drugs (90) were due to them not registered with the DDA. This indicates that the circulation of  
53  
54  
55  
56  
57  
58  
59  
60

1  
2  
3 225 unregistered drugs in market is a serious issue in Nepal which may be contributed to by the open  
4  
5 226 and unregulated border with India.  
6  
7

8 227 Both allopathic and ayurvedic medicines are widely used in Nepal. Allopathic medicines are the  
9  
10 228 modern medicines that are manufactured synthetically whereas ayurvedic medicines are the  
11  
12 229 traditional medicines which uses the natural remedies to improve health or to treat diseases. Both  
13  
14 230 types of medicines are commercially manufactured in Nepal in addition to being imported mostly  
15  
16 231 from India. There are two groups of manufacturers of ayurvedic drugs in Nepal. The first being  
17  
18 232 the registered companies which sell their products in packages through registered shops. Secondly,  
19  
20 233 the ayurvedic drugs are made by individuals or small business holders without being registered at  
21  
22 234 DDA and sell their ayurvedic products in streets, through door-to-door service, and through  
23  
24 235 individual networks. We found that both allopathic and ayurvedic medicines were recalled due to  
25  
26 236 their non-compliance with government standards. Ayurvedic medicines are utilized prominently  
27  
28 237 in Nepali communities, and sometimes, they are used concomitantly with allopathic medicines<sup>21</sup>.  
29  
30 238 There has been an increasing interest in the study of traditional medicine in different parts of  
31  
32 239 world<sup>22</sup>. However, there is still lack of quality research and standards, and stringent regulatory  
33  
34 240 environment for this sector.  
35  
36  
37  
38  
39  
40

41 241 Essential medicines are defined by WHO as the medicines that satisfy the priority healthcare needs  
42  
43 242 of the population<sup>23</sup>. The concept of essential medicines was adopted in 1986 A.D. in Nepal to  
44  
45 243 enhance access of essential medicines to every individual. The main criteria for selection of the  
46  
47 244 medicines in the National List of Essential Medicine (NLEM) of Nepal are public health relevance,  
48  
49 245 efficacy, safety, cost-effectiveness and access of the drugs. The NLEM 2016 of Nepal contains  
50  
51 246 359 medicines thus having 86 medicines more than NLEM 2011<sup>13</sup>. The following criteria were  
52  
53 247 used for including a medicine in NLEM: approved and licensed in Nepal, relevance to a disease  
54  
55  
56  
57  
58  
59  
60

1  
2  
3 248 posing public health problem, proven efficacy and safety, aligned with standard treatment  
4  
5 249 guideline of Nepal, stable under storage conditions, cost-effective, and access. However in certain  
6  
7  
8 250 conditions, some medicines are excluded from the NLEM list: those banned in Nepal, over safety  
9  
10 251 concerns, if medicine with higher efficiency, safety profile and lower cost is available, irrelevant  
11  
12 252 to public health disease burden, antimicrobial resistant, medicine with abuse and misuse  
13  
14 253 potential<sup>13</sup>. Our study showed that some of the recalled allopathic medicines were essential drugs.  
15  
16  
17 254 Jha et al.<sup>16</sup> indicated the presence of high number of substandard essential medicines and majority  
18  
19 255 of which were purchased by Government of Nepal. Essential medicines for various illnesses are  
20  
21 256 supplied free of cost in Nepal through government hospitals, health care centers and health posts.  
22  
23  
24 257 Poor quality of essential medicines can have serious impact on public health. As significant  
25  
26 258 proportion of drugs recalled by DDA included essential medicines distributed by Government of  
27  
28 259 Nepal, there is enough room to improve the procurement practices and upgrading of health  
29  
30 260 facilities in Nepal that store and distribute medicines. In one study<sup>24</sup> that looked into the  
31  
32 261 procurement practices in Nepal, it was reported that the majority of hospital pharmacies in Nepal  
33  
34 262 use an expensive direct procurement model for purchasing medicines. They relied on doctors'  
35  
36 263 prescriptions to choose a particular brand, which may be influenced by pharmaceutical companies'  
37  
38 264 marketing strategies. Most of the hospital pharmacies procured only registered medicines, a  
39  
40 265 minority reported purchasing unregistered medicines through unauthorized supply-chains. Not all  
41  
42 266 pharmacies followed Basel Statements during procurement of medicines. Such pharmacies may  
43  
44  
45 267 need awareness and training to fully adopt regulation of national and international policies to  
46  
47 268 enhance accessibility to quality medicines.  
48  
49  
50  
51  
52 269 Among the recalled groups, antimicrobial group of medicines had the highest frequency of recall  
53  
54 270 incidents. Acharya et al.<sup>25</sup> highlighted the problem of antimicrobial resistance in Nepal as an alarm

1  
2  
3 271 bell for worse public health situation. Suboptimal dose or poorly manufactured antibiotic medicine  
4  
5 272 increases the chance of antimicrobial resistance<sup>26</sup>. Most of the recalled therapeutic categories of  
6  
7  
8 273 medicines like vitamins and minerals, NSAIDs, other antipyretic and analgesic agents, antiseptics,  
9  
10 274 fluid and electrolyte replenishment items and others are over-the-counter medicines that can be  
11  
12 275 brought from the pharmacy without prescription. Such medicines can pose a significant threat  
13  
14  
15 276 patients who consume them<sup>27</sup>. Few anti-diabetes medicines were also recalled. Consumption of  
16  
17 277 such medicines may increase the incidence of macrovascular and microvascular complications due  
18  
19 278 to compromised glucose control<sup>28</sup>.

20  
21 279 Our study showed that some of the drugs were recalled due to failure in various laboratory tests  
22  
23  
24 280 like microbial test, assays, content uniformity test, weight variation, impurity test, dissolution test,  
25  
26 281 friability test as well as identification and sterility test. Many of these failures can be linked to  
27  
28 282 inadequate quality control measures during manufacturing and inappropriate procedures for  
29  
30  
31 283 transportation and storage and other logistic issues<sup>15</sup>.

32  
33 284 Jha *et al.* pointed out that only 13% of 62 health facility inspected followed medicine storage  
34  
35  
36 285 guidelines for light, heat and humidity<sup>16</sup>. Keeping the temperature and humidity within a specified  
37  
38 286 range is necessary because it has a major role in degradation of medicines. Another reason was  
39  
40 287 failure to comply with claims and incorrect labelling. The DDA regulation requires appropriate  
41  
42 288 labelling of marketed medicines to ensure patient safety. Thus, drug analysts and the drug  
43  
44  
45 289 regulators should be encouraged to remain vigilant about the possibility of counterfeiting  
46  
47 290 possibility. They should conduct appropriate analysis including chemical, physical, package  
48  
49  
50 291 inspection, and authentication efforts to ensure quality and safety of drugs getting to the ultimate  
51  
52 292 user<sup>29</sup>.

1  
2  
3 293 Domestically produced and imported medicines in Nepal should have the registration license from  
4  
5 294 DDA<sup>8</sup>. Nonetheless, we found that high numbers of unregistered drugs were recalled during the  
6  
7  
8 295 inspection. Drug suppliers, wholesalers, and even retailers should ensure that the drugs they are  
9  
10 296 handling is duly registered with the national regulatory body to ensure only safe and efficacious  
11  
12 297 drugs get to the patient. Also, the regulatory body should conduct post-market surveillance to  
13  
14 298 ameliorate the situation. Unregistered medical products in Nepal may or may not have been  
15  
16 299 registered in India. Since Nepal shares open and poorly regulated boarder with India, drugs  
17  
18 300 registered in India are also easily sold in the Nepali market, especially in bordering districts. We  
19  
20  
21 301 found that nearly half of the total recalled medicines were imported from India. India is the leading  
22  
23 302 country in counterfeit drug production, having as much as 35% of the world production originating  
24  
25  
26 303 within its borders<sup>30</sup>.

27  
28  
29 304 The COVID-19 pandemic has resulted in the surge of substandard and falsified medical products  
30  
31 305 including drugs, masks, sanitizers, diagnostic tests, and vaccines and other essential medical  
32  
33 306 products<sup>31</sup>. Rampant circulation of fake medical products during emergencies has happened  
34  
35 307 throughout history<sup>31</sup>. Counterfeit respirators and masks pose additional risk to health care  
36  
37 308 workers<sup>32</sup>. Falsified chloroquine was seized in Cameroon, Congo and Niger between March and  
38  
39 309 May 2020. Chloroquine was controversially announced as the drug for the treatment of COVID-  
40  
41 310 19<sup>33</sup>. The US FDA uncovered nearly 1,300 fraudulent products during early days of COVID-19<sup>34</sup>.  
42  
43  
44 311 DDA Nepal has recently amended the standard for Instant Hand Sanitizer in order to prohibit  
45  
46 312 selling of substandard, falsified and unregistered sanitizers<sup>35</sup>. Between September and November  
47  
48 313 2020, the DDA issued recall notices for 19 hand sanitizers which failed to comply with the standard  
49  
50 314 guideline. Some sanitizers were found to contain methanol, rather than ethyl alcohol and isopropyl  
51  
52 315 alcohol. Methanol is very toxic. Use of hand sanitizer containing methanol may cause transdermal  
53  
54  
55  
56  
57  
58  
59  
60

1  
2  
3 316 absorption and increases the risk of systemic toxicity<sup>36</sup>. The increase in the demand for hand  
4  
5 317 sanitizers and other medicines in the face of COVID-19 has increased the growth of e-commerce.  
6  
7 318 Online sale of pharmaceutical products has just started in Nepal during recent years. WHO has  
8  
9 319 reported that 60% of medications purchased through the internet could be counterfeit or  
10  
11 320 substandard, and more than 50% of medications purchased online from sites that concealed their  
12  
13 321 actual physical address were found to be low quality medicines<sup>37</sup>. Nepali regulating agencies  
14  
15 322 should pay special attention to this new method of doing business in Nepal to protect the people  
16  
17 323 from consumption of low-quality and fake medical products. Inexorable growth of online  
18  
19 324 pharmacies, unregulated websites and social media platforms for business may contribute to the  
20  
21 325 dispensing of unapproved, subpotent, counterfeit, expired or illegal drugs, and prescription drugs  
22  
23 326 without valid prescriptions<sup>38</sup>.

## 327 **CONCLUSION**

328 In this paper, we presented a detailed pattern of low-quality and fake drugs circulating in Nepal in  
329 the past decade using recall notice. We showed that the number of recalled drugs has significantly  
330 increased. This might be attributed either to a greater surveillance by DDA or actual increase in  
331 the levels of substandard, falsified, and unregistered medicines in the market. However, our  
332 analysis was not enough to identify the exact cause of increase in the recalled drugs. Like global  
333 trends, antimicrobial drugs were the most recalled drugs in Nepal. The recall notices used did not  
334 provide information on the number of samples collected for testing or inspection and location of  
335 sample collection. Therefore, our analysis did not report the rate or prevalence of low-quality  
336 drugs. Since sample collection locations were not available, it was not possible to know the most  
337 vulnerable districts of Nepal for low-quality drugs. Therefore, more studies are needed to  
338 understand the prevalence of substandard and falsified drugs in Nepal covering different parts of

1  
2  
3 339 the country on regular basis. We suggest having more stringent regulatory systems and  
4  
5 340 implementation for pharmaceutical manufacturing industries and enhanced post marketing  
6  
7  
8 341 surveillance.

9  
10 342 Contributors: BG contributed to conceptualization and study design, data analysis, manuscript  
11 343 revision. AN, MB contributed to data collection, analysis and first draft. ST contributed to data  
12 344 collection. All authors gave approval for the final version of the manuscript.

13 345  
14  
15 346 Funding: No specific funding supported this.

16 347  
17 348 Competing interests: None declared.

18 349  
19 350 Data sharing: All data relevant to the study are included in the article or uploaded as supplementary  
20 351 information. Author compiled & curated raw data will be made available with a reasonable request  
21 352 to corresponding author.

22 353  
23 354 Ethical approval: This study does not involve human participants.

25 355  
26  
27  
28  
29  
30  
31  
32  
33  
34  
35  
36  
37  
38  
39  
40  
41  
42  
43  
44  
45  
46  
47  
48  
49  
50  
51  
52  
53  
54  
55  
56  
57  
58  
59  
60

356 **References**

- 357 1. Seiter, A. Health and Economic Consequences of Counterfeit Drugs. *Clin. Pharmacol. Ther.* **85**, 576–578 (2009).
- 358 2. WHO | Pharmaceutical products. *WHO* [http://www.who.int/topics/pharmaceutical\\_products/en/](http://www.who.int/topics/pharmaceutical_products/en/).
- 359 3. Ozawa, S. *et al.* Prevalence and Estimated Economic Burden of Substandard and Falsified Medicines in Low- and Middle-  
360 Income Countries: A Systematic Review and Meta-analysis. *JAMA Netw. Open* **1**, e181662 (2018).
- 361 4. OECD & European Union Intellectual Property Office. *Trade in Counterfeit Pharmaceutical Products*. (OECD, 2020).  
362 doi:10.1787/a7c7e054-en.
- 363 5. Sharma, N., Barstis, T. & Giri, B. Advances in paper-analytical methods for pharmaceutical analysis. *Eur. J. Pharm. Sci.* **111**,  
364 46–56 (2018).
- 365 6. Least Developed Country Category: Nepal Profile | Department of Economic and Social Affairs.  
366 <https://www.un.org/development/desa/dpad/least-developed-country-category-nepal.html>.
- 367 7. Setopati. Domestic medicine market expanding. <https://en.setopati.com/market/126366/>.
- 368 8. DDA: Drugs Act 2035. <https://www.dda.gov.np/content/drugs-act-2035>.
- 369 9. Gyanwali, P. *et al.* Surveillance of Quality of Medicines Available in the Nepalese Market: A Study from Kathmandu Valley. *J.*  
370 *Nepal Health Res. Counc.* **13**, 233–240 (2015).
- 371 10. Poudel, R. S., Shrestha, S., Thapa, S., Poudel, B. K. & Chhetri, M. Assessment of primary labeling of medicines manufactured  
372 by Nepalese pharmaceutical industries. *J. Pharm. Policy Pract.* **11**, 13 (2018).
- 373 11. Poudel, A., Mohamed Ibrahim, M. I., Mishra, P. & Palaian, S. Assessment of the availability and rationality of unregistered  
374 fixed dose drug combinations in Nepal: a multicenter cross-sectional study. *Glob. Health Res. Policy* **2**, 14 (2017).
- 375 12. Almuzaini, T., Sammons, H. & Choonara, I. Substandard and falsified medicines in the UK: a retrospective review of drug  
376 alerts (2001–2011). *BMJ Open* **3**, e002924 (2013).
- 377 13. DDA: Essential Drug List. <https://www.dda.gov.np/content/essential-drug-list>.
- 378 14. Substandard and falsified medical products. [https://www.who.int/news-room/fact-sheets/detail/substandard-and-falsified-](https://www.who.int/news-room/fact-sheets/detail/substandard-and-falsified-medical-products)  
379 [medical-products](https://www.who.int/news-room/fact-sheets/detail/substandard-and-falsified-medical-products).
- 380 15. WHO | WHO Global Surveillance and Monitoring System for substandard and falsified medical products. *WHO*  
381 <http://www.who.int/medicines/regulation/ssffc/publications/gsms-report-sf/en/>.
- 382 16. Jha, A. K. *et al.* *Quality of essential medicines in public health care facilities of Nepal–2019*. 1–16 [http://nhrc.gov.np/wp-](http://nhrc.gov.np/wp-content/uploads/2020/08/Drug-report.pdf)  
383 [content/uploads/2020/08/Drug-report.pdf](http://nhrc.gov.np/wp-content/uploads/2020/08/Drug-report.pdf) (2019).



- 1  
2  
3 384 17. Gyanwali, P. *et al.* Surveillance of Quality of Medicines Available in the Nepalese Market: A Study from Kathmandu Valley. *J.*  
4 385 *Nepal Health Res. Counc.* (2015).  
5  
6 386 18. Research, C. for D. E. and. Drug Recalls. *FDA* <https://www.fda.gov/drugs/drug-safety-and-availability/drug-recalls> (2019).  
7  
8 387 19. Nagaich, U. & Sadhna, D. Drug recall: An incubus for pharmaceutical companies and most serious drug recall of history. *Int.*  
9 388 *J. Pharm. Investig.* **5**, 13–19 (2015).  
10  
11 389 20. Hall, K., Stewart, T., Chang, J. & Freeman, M. K. Characteristics of FDA drug recalls: A 30-month analysis. *Am. J. Health-Syst.*  
12 390 *Pharm. AJHP Off. J. Am. Soc. Health-Syst. Pharm.* **73**, 235–240 (2016).  
13  
14 391 21. Shrestha, S., Danekhu, K., Sapkota, B., Jha, N. & Kc, B. Herbal pharmacovigilance in Nepal: challenges and recommendations.  
15 392 *F1000Research* **9**, 111 (2020).  
16  
17 393 22. WHO. WHO global report on traditional and complementary medicine 2019. [https://www.who.int/publications-detail-](https://www.who.int/publications-detail-redirect/978924151536)  
18 394 [redirect/978924151536](https://www.who.int/publications-detail-redirect/978924151536).  
19  
20 395 23. WHO | Essential medicines. *WHO* [http://www.who.int/medicines/services/essmedicines\\_def/en/](http://www.who.int/medicines/services/essmedicines_def/en/).  
21  
22 396 24. Shrestha, M., Moles, R., Ranjit, E. & Char, B. Medicine procurement in hospital pharmacies of Nepal: A qualitative study  
23 397 based on the Basel Statements. *PloS One* **13**, e0191778 (2018).  
24  
25 398 25. Acharya, K. P. & Wilson, R. T. Antimicrobial Resistance in Nepal. *Front. Med.* **6**, 105 (2019).  
26  
27 399 26. Kelesidis, T. & Falagas, M. E. Substandard/counterfeit antimicrobial drugs. *Clin. Microbiol. Rev.* **28**, 443–464 (2015).  
28  
29 400 27. Rojas-Cortés, R. Substandard, falsified and unregistered medicines in Latin America, 2017-2018. *Rev. Panam. Salud Publica*  
30 401 *Pan Am. J. Public Health* **44**, e125 (2020).  
31  
32 402 28. Saraswati, K., Sichanh, C., Newton, P. N. & Caillet, C. Quality of medical products for diabetes management: a systematic  
33 403 review. *BMJ Glob. Health* **4**, e001636 (2019).  
34  
35 404 29. Alghannam, A., Aslanpour, Z., Evans, S. & Schifano, F. A systematic review of counterfeit and substandard medicines in field  
36 405 quality surveys. *Integr. Pharm. Res. Pract.* **3**, 71–88 (2014).  
37  
38 406 30. Wertheimer, A. I. & Santella, T. M. Counterfeit drugs: defining the problem and finding solutions. *Expert Opin. Drug Saf.* **4**,  
39 407 619–622 (2005).  
40  
41 408 31. Newton, P. N. *et al.* COVID-19 and risks to the supply and quality of tests, drugs, and vaccines. *Lancet Glob. Health* **8**, e754–  
42 409 e755 (2020).  
43  
44 410 32. Ippolito, M., Gregoretti, C., Cortegiani, A. & Iozzo, P. Counterfeit filtering facepiece respirators are posing an additional risk  
45 411 to health care workers during COVID-19 pandemic. *Am. J. Infect. Control* **48**, 853–854 (2020).  
46  
47  
48  
49  
50  
51  
52  
53  
54  
55  
56  
57  
58  
59  
60

- 1  
2  
3 412 33. Waffo Tchounga, C. A. *et al.* Composition analysis of falsified chloroquine phosphate samples seized during the COVID-19  
4  
5 413 pandemic. *J. Pharm. Biomed. Anal.* **194**, 113761 (2021).  
6  
7 414 34. McMeekin, J. National Consumer Protection Week: FDA Is Vigilant in Protecting Consumers Against COVID-19 Vaccine  
8  
9 415 Scams. *FDA* (2021).  
10  
11 416 35. DDA. DDA: Instant Hand Sanitizer (Alcohol Based) सम्बन्धित अत्यन्त जरुरी सूचना. (2020).  
12  
13 417 36. Chan, A. P. L. & Chan, T. Y. K. Methanol as an Unlisted Ingredient in Supposedly Alcohol-Based Hand Rub Can Pose Serious  
14  
15 418 Health Risk. *Int. J. Environ. Res. Public. Health* **15**, (2018).  
16  
17 419 37. Ashames, A., Bhandare, R., Zain AlAbdin, S., Alhalabi, T. & Jassem, F. Public Perception toward E-commerce of Medicines  
18  
19 420 and Comparative Pharmaceutical Quality Assessment Study of Two Different Products of Furosemide Tablets from  
20  
21 421 Community and Illicit Online Pharmacies. *J. Pharm. Bioallied Sci.* **11**, 284–291 (2019).  
22  
23 422 38. Fung, C. H., Woo, H. E. & Asch, S. M. Controversies and legal issues of prescribing and dispensing medications using the  
24  
25 423 Internet. *Mayo Clin. Proc.* **79**, 188–194 (2004).  
26  
27 424  
28  
29  
30  
31  
32  
33  
34  
35  
36  
37  
38  
39  
40  
41  
42  
43  
44  
45  
46  
47  
48  
49  
50  
51  
52  
53  
54  
55  
56  
57  
58  
59  
60

1  
2  
3  
4  
5  
6  
7  
8  
9  
10  
11  
12  
13  
14  
15  
16  
17  
18  
19  
20  
21  
22  
23  
24  
25  
26  
27  
28  
29  
30  
31  
32  
33  
34  
35  
36  
37  
38  
39  
40  
41  
42  
43  
44  
45  
46  
47  
48  
49  
50  
51  
52  
53  
54  
55  
56  
57  
58  
59  
60

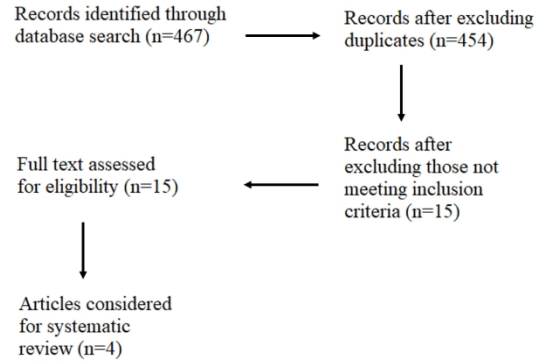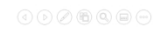

Figure 1: Flow chart of research papers search procedure

1283x721mm (38 x 38 DPI)

1  
2  
3  
4  
5  
6  
7  
8  
9  
10  
11  
12  
13  
14  
15  
16  
17  
18  
19  
20  
21  
22  
23  
24  
25  
26  
27  
28  
29  
30  
31  
32  
33  
34  
35  
36  
37  
38  
39  
40  
41  
42  
43  
44  
45  
46  
47  
48  
49  
50  
51  
52  
53  
54  
55  
56  
57  
58  
59  
60

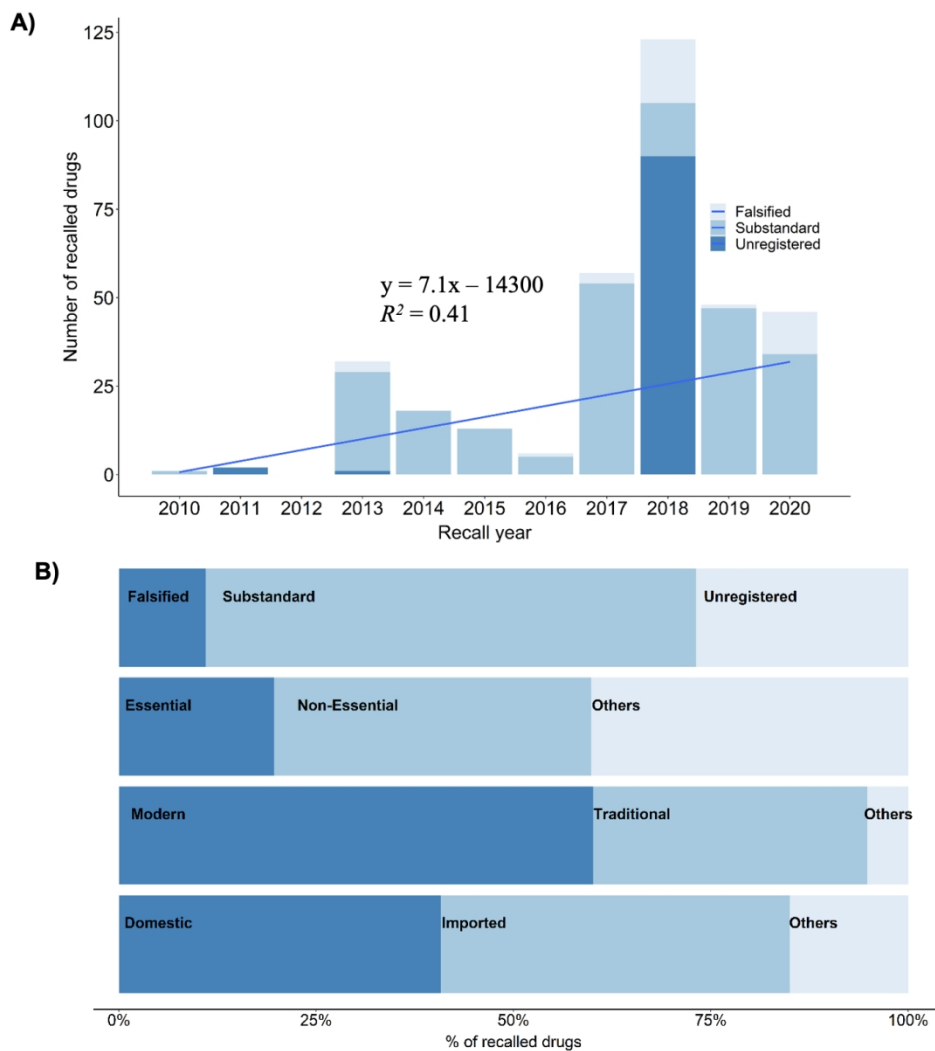

Figure 2: (A) Temporal trend of recalled pharmaceutical products in Nepal. (B) Contribution of different categories of pharmaceutical products in the recall list.

671x719mm (57 x 57 DPI)

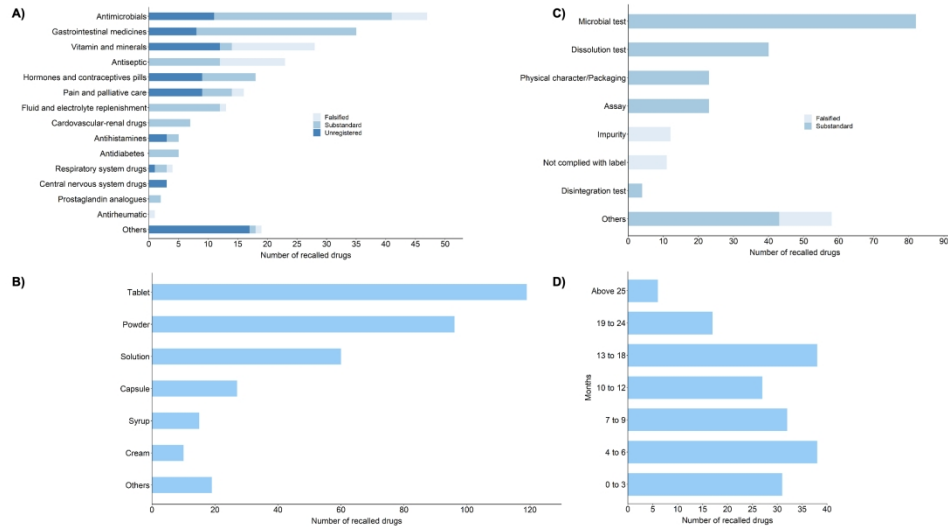

Figure 3: (A) Categories of recalled drugs based on their therapeutics, (B) Types of dosage forms of recalled drugs, (C) Major reasons for recalling the pharmaceutical products, (D) Self life of recalled pharmaceutical products after the recall (in months).

1283x719mm (57 x 57 DPI)

# 1 Pattern of drug recalls and quality of pharmaceutical products in

## 2 Nepal

3 Astha Neupane, Maheshwor Bastakoti, Sabita Tamang, Basant Giri\*

4 Center for Analytical Sciences, Kathmandu Institute of Applied Sciences, P. O. Box 23002,

5 Kathmandu, Nepal

### 7 Supplementary Material

8 Table S1: Result of literature search of peer-reviewed documents reporting drug quality data

| Keywords                                                                                                     | Number of articles found |                |               |                |
|--------------------------------------------------------------------------------------------------------------|--------------------------|----------------|---------------|----------------|
|                                                                                                              | PubMed                   | Web of Science | Springer link | Google Scholar |
| Counterfeit* OR substandard* OR fake<br>OR spurious OR unregulated OR<br>unregistered OR falsified* OR fraud | 14532                    | 51113          | 71770         | 41100          |
| Drug OR medicine OR pharmaceutical                                                                           | 4977168                  | 4579007        | 1386455       | 728000         |
| Nepal*                                                                                                       | 12868                    | 18132          | 16862         | 26500          |
| 1 AND 2 AND 3                                                                                                | 13                       | 10             | 393           | 51             |

### 9 List of research papers that included drug quality in Nepal

1. Poudel, Ramesh Sharma, et al. "Assessment of primary labeling of medicines manufactured by Nepalese pharmaceutical industries." *Journal of pharmaceutical policy and practice* 11.1 (2018): 1-6.
2. Gyanwali, P., et al. "Surveillance of Quality of Medicines Available in the Nepalese Market: A Study from Kathmandu Valley." *Journal of Nepal Health Research Council* (2015).
3. Poudel, Arjun, et al. "Assessment of the availability and rationality of unregistered fixed dose drug combinations in Nepal: a multicenter cross-sectional study." *Global health research and policy* 2.1 (2017): 1-13.
4. Jha, A. K., et al. *Quality of essential medicines in public health care facilities of Nepal–2019*. Nepal Health Research Council, 2019.



## PRISMA 2020 Checklist

| Section and Topic             | Item # | Checklist item                                                                                                                                                                                                                                                                                       | Location where item is reported |
|-------------------------------|--------|------------------------------------------------------------------------------------------------------------------------------------------------------------------------------------------------------------------------------------------------------------------------------------------------------|---------------------------------|
| <b>TITLE</b>                  |        |                                                                                                                                                                                                                                                                                                      |                                 |
| Title                         | 1      | Identify the report as a systematic review.                                                                                                                                                                                                                                                          | -                               |
| <b>ABSTRACT</b>               |        |                                                                                                                                                                                                                                                                                                      |                                 |
| Abstract                      | 2      | See the PRISMA 2020 for Abstracts checklist.                                                                                                                                                                                                                                                         | Page 2                          |
| <b>INTRODUCTION</b>           |        |                                                                                                                                                                                                                                                                                                      |                                 |
| Rationale                     | 3      | Describe the rationale for the review in the context of existing knowledge.                                                                                                                                                                                                                          | Page 4                          |
| Objectives                    | 4      | Provide an explicit statement of the objective(s) or question(s) the review addresses.                                                                                                                                                                                                               | Page 5                          |
| <b>METHODS</b>                |        |                                                                                                                                                                                                                                                                                                      |                                 |
| Eligibility criteria          | 5      | Specify the inclusion and exclusion criteria for the review and how studies were grouped for the syntheses.                                                                                                                                                                                          | Page 6                          |
| Information sources           | 6      | Specify all databases, registers, websites, organisations, reference lists and other sources searched or consulted to identify studies. Specify the date when each source was last searched or consulted.                                                                                            | Page 5&6                        |
| Search strategy               | 7      | Present the full search strategies for all databases, registers and websites, including any filters and limits used.                                                                                                                                                                                 | Page 6                          |
| Selection process             | 8      | Specify the methods used to decide whether a study met the inclusion criteria of the review, including how many reviewers screened each record and each report retrieved, whether they worked independently, and if applicable, details of automation tools used in the process.                     | Page 5&6                        |
| Data collection process       | 9      | Specify the methods used to collect data from reports, including how many reviewers collected data from each report, whether they worked independently, any processes for obtaining or confirming data from study investigators, and if applicable, details of automation tools used in the process. | Page 5&6                        |
| Data items                    | 10a    | List and define all outcomes for which data were sought. Specify whether all results that were compatible with each outcome domain in each study were sought (e.g. for all measures, time points, analyses), and if not, the methods used to decide which results to collect.                        | -                               |
|                               | 10b    | List and define all other variables for which data were sought (e.g. participant and intervention characteristics, funding sources). Describe any assumptions made about any missing or unclear information.                                                                                         | -                               |
| Study risk of bias assessment | 11     | Specify the methods used to assess risk of bias in the included studies, including details of the tool(s) used, how many reviewers assessed each study and whether they worked independently, and if applicable, details of automation tools used in the process.                                    | -                               |
| Effect measures               | 12     | Specify for each outcome the effect measure(s) (e.g. risk ratio, mean difference) used in the synthesis or presentation of results.                                                                                                                                                                  | -                               |
| Synthesis methods             | 13a    | Describe the processes used to decide which studies were eligible for each synthesis (e.g. tabulating the study intervention characteristics and comparing against the planned groups for each synthesis (item #5)).                                                                                 | Page 6                          |
|                               | 13b    | Describe any methods required to prepare the data for presentation or synthesis, such as handling of missing summary statistics, or data conversions.                                                                                                                                                | Page 7                          |
|                               | 13c    | Describe any methods used to tabulate or visually display results of individual studies and syntheses.                                                                                                                                                                                               | Page 7                          |
|                               | 13d    | Describe any methods used to synthesize results and provide a rationale for the choice(s). If meta-analysis was performed, describe the model(s), method(s) to identify the presence and extent of statistical heterogeneity, and software package(s) used.                                          | Page 7                          |
|                               | 13e    | Describe any methods used to explore possible causes of heterogeneity among study results (e.g. subgroup analysis, meta-regression).                                                                                                                                                                 | -                               |
|                               | 13f    | Describe any sensitivity analyses conducted to assess robustness of the synthesized results.                                                                                                                                                                                                         | -                               |
| Reporting bias assessment     | 14     | Describe any methods used to assess risk of bias due to missing results in a synthesis (arising from reporting biases).                                                                                                                                                                              | -                               |
| Certainty                     | 15     | Describe any methods used to assess certainty (or confidence) in the body of evidence for an outcome.                                                                                                                                                                                                | -                               |







# PRISMA 2020 Checklist

1  
2  
3  
4  
5  
6  
7  
8  
9  
10  
11  
12  
13  
14  
15  
16  
17  
18  
19  
20  
21  
22  
23  
24  
25  
26  
27  
28  
29  
30  
31  
32  
33  
34  
35  
36  
37  
38  
39  
40  
41  
42  
43  
44  
45  
46  
47

| Section and Topic | Item # | Checklist item | Location where item is reported |
|-------------------|--------|----------------|---------------------------------|
| other materials   |        |                |                                 |

From: Page MJ, McKenzie JE, Bossuyt PM, Boutron I, Hoffmann TC, Mulrow CD, et al. The PRISMA 2020 statement: an updated guideline for reporting systematic reviews. *BMJ* 2021;372:n71. doi: 10.1136/bmj.n71  
 For more information, visit: <http://www.prisma-statement.org/>

For peer review only

# BMJ Open

## A review of drug recalls and quality of pharmaceutical products in Nepal

|                                 |                                                                                                                                                                                                                                                                                                                                                                              |
|---------------------------------|------------------------------------------------------------------------------------------------------------------------------------------------------------------------------------------------------------------------------------------------------------------------------------------------------------------------------------------------------------------------------|
| Journal:                        | <i>BMJ Open</i>                                                                                                                                                                                                                                                                                                                                                              |
| Manuscript ID                   | bmjopen-2021-053479.R2                                                                                                                                                                                                                                                                                                                                                       |
| Article Type:                   | Original research                                                                                                                                                                                                                                                                                                                                                            |
| Date Submitted by the Author:   | 11-May-2022                                                                                                                                                                                                                                                                                                                                                                  |
| Complete List of Authors:       | Neupane, Astha; Kathmandu Institute of Applied Sciences, Center for Analytical Sciences<br>Bastakoti, Maheshwor; Kathmandu Institute of Applied Sciences, Center for Analytical Sciences<br>Tamang, Sabita; Kathmandu Institute of Applied Sciences, Center for Analytical Sciences<br>Giri, Basant; Kathmandu Institute of Applied Sciences, Center for Analytical Sciences |
| <b>Primary Subject Heading</b>: | Public health                                                                                                                                                                                                                                                                                                                                                                |
| Secondary Subject Heading:      | Global health, Health policy, Pharmacology and therapeutics                                                                                                                                                                                                                                                                                                                  |
| Keywords:                       | Public health < INFECTIOUS DISEASES, COVID-19, Health economics < HEALTH SERVICES ADMINISTRATION & MANAGEMENT                                                                                                                                                                                                                                                                |
|                                 |                                                                                                                                                                                                                                                                                                                                                                              |

SCHOLARONE™  
Manuscripts

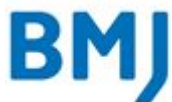

I, the Submitting Author has the right to grant and does grant on behalf of all authors of the Work (as defined in the below author licence), an exclusive licence and/or a non-exclusive licence for contributions from authors who are: i) UK Crown employees; ii) where BMJ has agreed a CC-BY licence shall apply, and/or iii) in accordance with the terms applicable for US Federal Government officers or employees acting as part of their official duties; on a worldwide, perpetual, irrevocable, royalty-free basis to BMJ Publishing Group Ltd ("BMJ") its licensees and where the relevant Journal is co-owned by BMJ to the co-owners of the Journal, to publish the Work in this journal and any other BMJ products and to exploit all rights, as set out in our [licence](#).

The Submitting Author accepts and understands that any supply made under these terms is made by BMJ to the Submitting Author unless you are acting as an employee on behalf of your employer or a postgraduate student of an affiliated institution which is paying any applicable article publishing charge ("APC") for Open Access articles. Where the Submitting Author wishes to make the Work available on an Open Access basis (and intends to pay the relevant APC), the terms of reuse of such Open Access shall be governed by a Creative Commons licence – details of these licences and which [Creative Commons](#) licence will apply to this Work are set out in our licence referred to above.

Other than as permitted in any relevant BMJ Author's Self Archiving Policies, I confirm this Work has not been accepted for publication elsewhere, is not being considered for publication elsewhere and does not duplicate material already published. I confirm all authors consent to publication of this Work and authorise the granting of this licence.

1  
2  
3  
4 1 **A review of drug recalls and quality of pharmaceutical products in**  
5  
6  
7 2 **Nepal**

8  
9 3 Astha Neupane, Maheshwor Bastakoti, Sabita Tamang, Basant Giri\*

10 4 Center for Analytical Sciences, Kathmandu Institute of Applied Sciences

11  
12  
13  
14 5 P. O. Box 23002, Kathmandu, Nepal

15  
16 6  
17 7  
18 8  
19 9 \*Correspondence

20 10  
21 11 Dr. Basant Giri

22 12 Center for Analytical Sciences, Kathmandu Institute of Applied Sciences

23  
24 13 PO BOX 23003, Kathmandu, Nepal

25  
26 14 bgiri@kias.org.np, chembasant@gmail.com

27  
28  
29 15  
30  
31  
32  
33 16 **Word count:** 3702 excluding abstract and references

1  
2  
3 **26 ABSTRACT**  
4

5 **27 Objectives:** To evaluate the pattern of substandard and falsified pharmaceutical products recall  
6  
7  
8 in Nepal.  
9

10 **29 Setting:** We analyzed drug recall notices issued by the Department of Drug Administration  
11  
12 (DDA), Nepal and systematically reviewed peer reviewed research articles during January 2010  
13  
14  
15 – December 2020.  
16

17 **32 Participants:** This study did not include human participants. However, data was collected from  
18  
19  
20 72 drug recall notices issued by DDA and four research papers.  
21

22 **34 Results:** A total of 346 pharmaceutical products were recalled during the reported period. The  
23  
24 number of recalled pharmaceutical products has increased significantly over the past decade in  
25  
26 Nepal. The most frequently recalled drugs were antimicrobials followed by gastrointestinal  
27  
28 medicines, vitamins and supplements, and pain and palliative medicines among others. Number  
29  
30 of imported recalled drugs were slightly higher (42.2%) than domestic recalled drugs (40.7%).  
31  
32  
33 Sixty-two percentage of recalled drugs were substandard, 11% were falsified and remaining 27%  
34  
35 were not registered at the DDA. Similarly, higher number of modern drugs (62%) were recalled  
36  
37 than traditional ones (35%). Hand sanitizers used to minimize COVID-19 transmission  
38  
39 contributed significantly to the list of recalled pharmaceutical products in 2020. Most of these  
40  
41 sanitizers contained significant amounts of methanol (as high as 75%v/v) instead of appropriate  
42  
43 amount of ethyl or isopropyl alcohol. The peer-reviewed research papers reported issues with  
44  
45 labelling, unregistered drugs and drugs failed in several laboratory testing.  
46  
47

48  
49 **46 Conclusion:** Our analysis showed that number of recalls of substandard and falsified drugs are  
50  
51 increasing in Nepal. Since the recall data in this paper did not include number of samples tested  
52  
53  
54  
55  
56  
57  
58  
59  
60

1  
2  
3 48 and location of samples collected, more studies to understand the prevalence of substandard and  
4  
5 49 falsified drugs in Nepal is recommended.  
6

7  
8 50 **Keywords:** Counterfeit drugs, falsified medical products, public health, substandard, falsified  
9  
10 51 drugs

#### Strength and limitations of this study

- This is the first study to evaluate the pattern of drug recall in Nepal.
- A comprehensive analysis of drug recall notice issued by Department of Drug Administration, Nepal from January 2010 to December 2020.
- Also includes a systematic review of peer-reviewed publications from 2010 to 2020 which reported poor quality drugs in Nepal.
- It does not include number of samples tested, location of sample collected, and impact of recall notice.
- Since we looked at pattern of recall drugs, it did not report the rate of low-quality drugs over the last decade.

26  
27 52

## 53 INTRODUCTION

30  
31 54 Pharmaceutical products are essential to treat, prevent, and save lives of millions of people  
32  
33 55 globally<sup>1</sup>. They should be safe, effective, and of good quality. Such products should be prescribed  
34  
35 56 by authorized medical practitioner and used rationally<sup>2</sup>. However, pharmaceutical products that do  
36  
37 57 not meet regulatory standards and quality threaten the health of the population of today and future.  
38  
39 58 Such products may be substandard or low-quality or falsified. Substandard or falsified drugs could  
40  
41 59 lead to drug resistance and put the lives of patients at risk in addition to increasing the economic  
42  
43 60 and social burden on people<sup>3</sup>. There are several reasons for the circulation of such substandard and  
44  
45 61 falsified products in market such as lack of access to affordable, quality, safe and effective medical  
46  
47 62 products, and good governance as well as poor ethical practices in health care facilities and  
48  
49 63 medicine outlets. Limited technical capacity in manufacturing, quality control, distribution and  
50  
51 64 testing also contribute to this problem<sup>4,5</sup>.

1  
2  
3 65 Ozawa et al. in a 2018 meta-analysis estimated that about 10.5% of the medicines worldwide are  
4  
5 66 either substandard or falsified. Prevalence of low-quality pharmaceutical products is higher in low-  
6  
7 67 and middle-income countries (13.6%) compared to high income countries. About 18.7% medicines  
8  
9 68 have been estimated to be low-quality in Africa and 13.7% in Asia. The most substandard or  
10  
11 69 falsified drugs are the antimalarials (19.1%)<sup>3</sup>.

12  
13  
14  
15 70 Nepal is one of the least developed countries<sup>6</sup> that shares open and poorly regulated borders with  
16  
17 71 India and China. These two countries are considered as major producers of low-quality and  
18  
19 72 falsified pharmaceutical products circulating in the global market<sup>4</sup>. The domestic market for  
20  
21 73 medical products in Nepal was estimated to be 70 billion Nepal rupees in 2019 which included  
22  
23 74 drugs (36 billion), raw materials and surgical equipment<sup>7</sup>. The Department of Drug Administration  
24  
25 75 (DDA) authorizes the distribution of all pharmaceutical products in Nepal including production,  
26  
27 76 distribution, export, and import. The DDA in Nepal is equivalent to the U.S. FDA and is  
28  
29 77 responsible to prevent the misuse or abuse of drugs and allied pharmaceutical substances<sup>8</sup>. Few  
30  
31 78 studies in the past have indicated the circulation of substandard, counterfeit, and unregistered drugs  
32  
33 79 in the Nepali market<sup>9,10,11</sup>. DDA Nepal recalls marketed drugs if the drugs do not fulfill any  
34  
35 80 requirement as indicated in the drug act 2035 B.S.<sup>8</sup>. It then issues public alerts and warnings when  
36  
37 81 substandard, falsified, and unregistered medicine incidents are detected. Analysis of pattern of  
38  
39 82 drug alerts, regulatory recalls and company led recalls could be helpful to understand major issues  
40  
41 83 responsible for the availability of poor-quality drugs and devise appropriate actions to mitigate the  
42  
43 84 problem<sup>12,13</sup>. Analysis of medical product recall and alert are available from few countries such as  
44  
45 85 the United Kingdom<sup>12</sup>, the Saudi Arabia<sup>14</sup>, which have shown a significant increase in the number  
46  
47 86 of recall drugs.

48  
49  
50  
51  
52 87 In this study, we report the pattern of recall of poor-quality drugs in Nepal by analyzing drug recall  
53  
54  
55  
56  
57

1  
2  
3 88 notice issued by the DDA. We analyzed temporal trend of low-quality drugs, types of drugs and  
4  
5 89 formulations, origin of drugs & manufacturers and reasoning for recall. We also reviewed research  
6  
7  
8 90 publications that reported drug quality data.  
9

## 11 91 **METHODOLOGY**

12  
13  
14 92 We analyzed drug recall notices published by DDA Nepal from January 2010 to December 2020.  
15  
16 93 The DDA publishes such notices in its bulletins, websites, and newspapers (<https://dda.gov.np/>).  
17  
18 94 We extracted all the information provided on the recall notice such as brand name, dosage form,  
19  
20  
21 95 batch number, manufacturing date, expiry date, recall date, reason for non-compliance, and the  
22  
23 96 manufacturer information. We used National List of Essential Medicines 2016 of Nepal to classify  
24  
25 97 the recalled drugs into essential and non-essential drugs<sup>15</sup> and the WHO definition to identify  
26  
27 98 substandard, falsified and unregistered drugs<sup>16</sup>. According to WHO definition, substandard drugs  
28  
29 99 are authorized medical products but fail to meet quality standards or specifications or both.  
30  
31  
32 100 Similarly, falsified drugs are medical products that misrepresent their identity, composition or  
33  
34 101 source<sup>17</sup>. Pharmaceutical products that did not pass dissolution test, active pharmaceutical  
35  
36 102 ingredient (API) assay, microbial test, leakage test, friability, were non-compliance with the  
37  
38 103 pharmacopeia for physical appearance, fungal count, weight variation, particulate matter test,  
39  
40 104 uniformity test, disintegration test, and pH test were put together under the substandard category.  
41  
42  
43 105 Similarly, drugs that contained impurities, active ingredient not meant to be there, had price sticker  
44  
45 106 without approval, or did not have product specification were classified as falsified pharmaceutical  
46  
47 107 products. The drugs that were recalled as being not registered at DDA Nepal were classified under  
48  
49 108 unregistered category. Unregistered drugs do not undergo evaluation and/or approval by DDA  
50  
51 109 Nepal. Based on the brand names of each non-ayurvedic pharmaceutical product, we identified  
52  
53  
54  
55  
56  
57  
58  
59  
60



1  
2  
3 110 their generic names and then categorized them into different groups based on their therapeutic  
4  
5 111 properties.

6  
7  
8 112 In addition to the recall notice, we systematically reviewed the published research works to find  
9  
10 113 the reporting of low-quality drugs in Nepali market. We specifically searched peer reviewed  
11  
12 114 research articles from electronic databases such as PubMed (2010-2020), Web of Science (2010-  
13  
14 115 2020), Springer link (2010-2020), and Google Scholar (2010-2020). We used the following search  
15  
16 116 terms in conjunction with Boolean search term (“OR”, “AND”) to identify related articles:  
17  
18 117 “counterfeit\*”, “substandard\*”, “falsified\*”, “fake”, “spurious”, “unregulated drugs”,  
19  
20 118 “unregistered”, or “frauds”; combined with “drug”, “medicine”, or “pharmaceutical”; “Nepal\*”.

21  
22 119 In Google Scholar same search terms were used, but instead of “Nepal\*”, we used “intitle:Nepal”.

23  
24 120 The articles were screened and evaluated manually through the title and abstract based on inclusion  
25  
26 121 criteria: date of publication (2010-2020), the language (English) in which the article was published,  
27  
28 122 the article should contain data/information on the prevalence of  
29  
30 123 falsified/spurious/counterfeit/substandard drugs and the location of experiment/research carried  
31  
32 124 out. Articles that did not meet the inclusion criteria were excluded. Also excluded were opinion  
33  
34 125 articles, letters, notes, conference papers, book chapters, editorials or comments or articles with no  
35  
36 126 abstracts or articles with counterfeit or substandard medicines related to animals.

37  
38 127 A flow chart of search procedure is given in figure 1. Initially, we identified 467 journal articles  
39  
40 128 after a search of literature in four different databases: PubMed, Springer link, Web of science and  
41  
42 129 Google scholar. We removed 13 duplicate articles and brought the number of articles to 454. By  
43  
44 130 screening the title and abstract of these articles, we removed 439 articles and we considered only  
45  
46 131 15 in next step (*see* Table S11 in supplementary information). We read the full text of these articles  
47  
48 132 and excluded 11 articles because they did not follow the inclusion criteria. At last, four  
49  
50  
51  
52  
53  
54  
55  
56  
57  
58  
59  
60

1  
2  
3 133 articles<sup>10,11,18,19</sup> were found to be relevant that contained primary information on the prevalence of  
4  
5 134 substandard, falsified, and unregistered medicines in the Nepali market.  
6  
7

8 135 *Figure 1: Flow chart of research papers search procedure*  
9

10 136 Statistical analyses of data such as Chi-square test, Fisher exact test and simple linear regression  
11  
12 137 were performed using R version 1.4.1106.  
13  
14

15 138 Patients and public involvement: Patient or the public were not involved in the design, conduct,  
16  
17 139 reporting, and dissemination plans for this study.  
18  
19  
20

## 21 140 **RESULTS**

22 141  
23 142 We analyzed recalled drugs during the period of 2010 – 2020. During this period 346  
24  
25 143 pharmaceutical products were recalled by DDA Nepal. The number of recalled low-quality drugs  
26  
27 144 in Nepal has significantly increased in the last decade (Figure 2A, linear regression,  $p$ -value < 0.05,  
28  
29 145 adjusted R-squared value = 0.335). We found that only one pharmaceutical product was recalled in  
30  
31 146 2010. The product was a lactate solution which is commonly used for fluid resuscitation. The  
32  
33 147 solution was recalled from the Nepali market because it did not pass the sterility test. There was  
34  
35 148 no recall in 2012. The year 2018 had the highest number of pharmaceutical products recalled (123  
36  
37 149 products, see Figure 2A). Forty-six products were recalled in the year 2020, majority of which  
38  
39 150 were hand sanitizers. The recalled pharmaceutical products were from 96 manufacturers mostly  
40  
41 151 from Nepal and India, few from Australia, Bangladesh, and China. Manufacturer of 91 recalled  
42  
43 152 drugs were unknown. The recalled pharmaceutical products included a significantly (two-sided  
44  
45 153 Fisher exact test,  $p$ -value < 0.001) higher number of imported medicines (153) items than  
46  
47 154 domestically manufactured ones (141). The imported recalled products were manufactured mostly  
48  
49 155 in India (97%, Figure 2B) and in drugs from Australia, Bangladesh and China. Country of origin  
50  
51 156 of 52 recalled pharmaceutical products were not identified.  
52  
53  
54  
55  
56  
57  
58  
59  
60

1  
2  
3 157 **Figure 2:** (A) Temporal trend of recalled pharmaceutical products in Nepal. (B) Contribution of  
4  
5 158 different categories of pharmaceutical products in the recall list.

6  
7  
8  
9 159 Sixty percentage (n=346) of recalled pharmaceutical products were modern or allopathic (208)  
10  
11 160 and 35% were traditional or ayurvedic (120) (Figure 2B). Two-sided Fisher exact test showed that  
12  
13 161 significantly higher number of modern pharmaceutical products were recalled (p-value < 0.001).  
14  
15 162 Twenty-seven percentage of the recalled drugs were unregistered at the DDA indicating they were  
16  
17 163 not authorized to be distributed and sold in Nepal. Similarly, twenty percentage of the recalled  
18  
19 164 drugs, mostly allopathic, were listed as essential medicines. 40% of the recalled drugs were non-  
20  
21 165 essential allopathic (p-value < 0.001) and 40% were ayurvedic drugs. Essential medicines are  
22  
23 166 distributed free of cost through government health centers<sup>15</sup> and only allopathic drugs are listed as  
24  
25 167 essential ones. Majority of the recalled pharmaceutical products were substandard (62%) followed  
26  
27 168 by unregistered (27%) and falsified (11%) (see Figure 2B). We found that the recall pattern among  
28  
29 169 these three categories were significantly different (one-way chi-square test, p-value < 0.001,  $\chi^2 =$   
30  
31 170 142.31, df = 2).

32  
33  
34  
35  
36 171 **Figure 3:** (A) Categories of recalled drugs based on their therapeutics, (B) Types of dosage  
37  
38 172 forms of recalled drugs, (C) Major reasons for recalling the pharmaceutical products, (D) Self  
39  
40 173 life of recalled pharmaceutical products after the recall (in months).

41  
42  
43  
44 174 The top 10 most recalled drugs were antimicrobials (13.6%) followed by gastrointestinal  
45  
46 175 medicines (10.1%), vitamins and minerals (8.1%), antiseptic (6.6), hormones and contraceptives  
47  
48 176 (5.2%), and pain and palliative care medicines (4.6), fluid and electrolyte replenishment items  
49  
50 177 (3.7%), cardiovascular and renal drugs (2.0%), anti-diabetes (1.4%) and antihistamines (1.4%)  
51  
52 178 (see Figure 3A). Remaining recalled drugs were CNS drugs, respiratory system drugs,  
53  
54 179 prostaglandin analogues, and antirheumatic agents. Nineteen drugs were not classified into any of

1  
2  
3 180 those and labelled as “others” because sufficient information was not available. Ayurvedic drugs  
4  
5 181 were not included in this categorization.  
6

7  
8 182 The DDA provided reason(s) for every recalled pharmaceutical product. Large number of drugs  
9  
10 183 (26.8%) were recalled because they were not registered at DDA. The most common reason for  
11  
12 184 recall among registered drugs was the failure to comply with microbial test (23.7%) followed by  
13  
14 185 failures in dissolution test (11.5%), in quantitative assay for active pharmaceutical ingredient  
15  
16 186 (6.6%), and in physical characteristics and packaging (6.6%). Eleven products did not comply with  
17  
18 187 labelling requirements and 12 had one or more impurities. Few samples categorized as “others”  
19  
20 188 were recalled due to failure in identification test and contained active ingredient in dietary  
21  
22 189 supplements (see Figure 3B). Tablets were the most recalled dosages forms followed by powder,  
23  
24 190 solution, capsules, syrups/suspension, and cream/ointment. Dosage forms of some products were  
25  
26 191 not identifiable, and they are categorized as “others” (Figure 3C). The shelf-life of recalled drugs  
27  
28 192 ranged from less than three months (16.4%) to more than two years at the time of recall (Figure  
29  
30 193 3D).  
31  
32  
33  
34

#### 35 194 **Low-quality drugs reported in research papers**

36  
37  
38 195 As stated in method section, only four research articles were included for detailed analysis. One  
39  
40 196 of these articles reported by Jha et al.<sup>18</sup> assessed the quality of essential medicines available in 62  
41  
42 197 public health care facilities across 21 districts of Nepal. The authors tested 244 batches of 20  
43  
44 198 different generics of essential medicines and found that 37 batches failed to meet the required  
45  
46 199 pharmacopeial standards. The quality failed medicines included both supplied by Government of  
47  
48 200 Nepal (62.2%) and purchased from local pharmacies (37.8%). The failed medicines included  
49  
50 201 antibiotics, supplements, anti-diabetics etc.  
51  
52  
53  
54  
55  
56  
57  
58  
59  
60

1  
2  
3 202 Providing required information on the label is another major issue. Most of the 759 pharmaceutical  
4  
5 203 products from 37 Nepali pharmaceutical companies inspected in Chitwan in 2017 missed at least  
6  
7 204 one critical information on the label such as drug quantity, name of pharmacopoeia, serial number  
8  
9 205 of pharmaceutical industries, price list, drug classification, and information in Nepali language<sup>10</sup>.  
10  
11 206 The reports showed that labels of 84% of drugs did not provide the directions for use. Similarly  
12  
13 207 90% of drug samples (n=40) in Kathmandu did not comply with the existing regulatory  
14  
15 208 requirement on labeling and 42.5% brands did not indicate the Pharmacopoeial standard<sup>9</sup>. The  
16  
17 209 same study showed that 40% of domestic and 28% imported brands failed to meet national criteria  
18  
19 210 during laboratory analysis. On average, 32.5% samples were found to be of substandard quality in  
20  
21 211 this study. Another study evaluated the availability and rationality of unregistered fixed-dose drug  
22  
23 212 combinations (FDCs) in Nepal using snowball sampling method and Health Action International  
24  
25 213 Asia-Pacific (HAI-AP) toolkit in 20 retail pharmacies. Forty-one unregistered fixed-dose anti-  
26  
27 214 inflammatory/analgesic/antipyretics drug combinations were found in five major cities of Nepal.  
28  
29 215 Regulatory authorities should initiate strict monitoring and appropriate regulatory mechanisms to  
30  
31 216 prohibit the use of unregistered and irrational FDCs.<sup>11</sup>  
32  
33  
34  
35  
36  
37

## 38 217 **DISCUSSION**

39 218  
40 219 Low-quality medicines or related products are recalled from the market by manufacturing  
41  
42 220 companies voluntarily or by the order of national or international drug regulatory bodies<sup>20</sup>. Many  
43  
44 221 recall incidents of poor quality medicine have been reported globally<sup>21</sup>. For example, Johnson and  
45  
46 222 Johnson recalled 200,000 bottles of liquid ibuprofen in 2013 due to possible contamination with  
47  
48 223 plastic particles. The US FDA had recalled the contaminated vials of corticosteroid medication in  
49  
50 224 2012 which was manufactured by the New England Compounding Center<sup>22</sup>. An analysis of drug  
51  
52 225 recall in the UK has shown a tenfold increase in the defective medicines from 2001 to 2011 mostly  
53  
54  
55  
56  
57  
58  
59  
60

1  
2  
3 226 due to contamination and issues with packaging<sup>12</sup>. Similarly, the number of drug recall reported  
4  
5 227 by Saudi Arabia Drug Authority increased six-folds from 2010 to 2018, in which the most  
6  
7  
8 228 commonly recalled drugs were antihypertensive drugs and antibiotics due to contamination and  
9  
10 229 issues with non-compliance with manufacturer's specifications.<sup>14</sup>  
11

12  
13 230 Our analysis showed that the overall trend of recalled drugs is increasing in Nepal. Starting from  
14  
15 231 a single drug recall in 2010 to highest numbers (123) in 2018. In this year, most of the recalled  
16  
17 232 drugs (90) were due to them not registered with the DDA. This indicates that the circulation of  
18  
19  
20 233 unregistered drugs in market is a serious issue in Nepal which may be contributed to by the open  
21  
22 234 and unregulated border with India.  
23

24  
25 235 Both allopathic and ayurvedic medicines are widely used in Nepal. Allopathic medicines are the  
26  
27 236 modern medicines that are manufactured synthetically whereas ayurvedic medicines are the  
28  
29 237 traditional medicines which uses the natural remedies to improve health or to treat diseases. Both  
30  
31 238 types of medicines are commercially manufactured in Nepal in addition to being imported mostly  
32  
33  
34 239 from India. There are two groups of manufacturers of ayurvedic drugs in Nepal. The first being  
35  
36 240 the registered companies which sell their products in packages through registered shops. Secondly,  
37  
38 241 the ayurvedic drugs are made by individuals or small business holders without being registered at  
39  
40  
41 242 DDA and sell their ayurvedic products in streets, through door-to-door service, and through  
42  
43 243 individual networks. We found that both allopathic and ayurvedic medicines were recalled due to  
44  
45 244 their non-compliance with government standards. Ayurvedic medicines are utilized prominently  
46  
47  
48 245 in Nepali communities, and sometimes, they are used concomitantly with allopathic medicines<sup>23</sup>.  
49  
50 246 There has been an increasing interest in the study of traditional medicine in different parts of  
51  
52 247 world<sup>24</sup>. However, there is still lack of quality research and standards, and stringent regulatory  
53  
54  
55 248 environment for this sector.  
56  
57  
58  
59  
60

1  
2  
3 249 Essential medicines are defined by WHO as the medicines that satisfy the priority healthcare needs  
4  
5 250 of the population<sup>25</sup>. The concept of essential medicines was adopted in 1986 A.D. in Nepal to  
6  
7 251 enhance access of essential medicines to every individual. The main criteria for selection of the  
8  
9  
10 252 medicines in the National List of Essential Medicine (NLEM) of Nepal are public health relevance,  
11  
12 253 efficacy, safety, cost-effectiveness and access of the drugs. The NLEM 2016 of Nepal contains  
13  
14 254 359 medicines thus having 86 medicines more than NLEM 2011<sup>15</sup>. The following criteria were  
15  
16  
17 255 used for including a medicine in NLEM: approved and licensed in Nepal, relevance to a disease  
18  
19 256 posing public health problem, proven efficacy and safety, aligned with standard treatment  
20  
21 257 guideline of Nepal, stable under storage conditions, cost-effective, and access. However in certain  
22  
23 258 conditions, some medicines are excluded from the NLEM list: those banned in Nepal, over safety  
24  
25  
26 259 concerns, if medicine with higher efficiency, safety profile and lower cost is available, irrelevant  
27  
28 260 to public health disease burden, antimicrobial resistant, medicine with abuse and misuse  
29  
30 261 potential<sup>15</sup>. Our study showed that some of the recalled allopathic medicines were essential drugs.  
31  
32  
33 262 Jha et al.<sup>18</sup> indicated the presence of high number of substandard essential medicines and majority  
34  
35 263 of which were purchased by Government of Nepal. Essential medicines for various illnesses are  
36  
37 264 supplied free of cost in Nepal through government hospitals, health care centers and health posts.  
38  
39  
40 265 Poor quality of essential medicines can have serious impact on public health. As significant  
41  
42 266 proportion of drugs recalled by DDA included essential medicines distributed by Government of  
43  
44 267 Nepal, there is enough room to improve the procurement practices and upgrading of health  
45  
46 268 facilities in Nepal that store and distribute medicines. In one study<sup>26</sup> that looked into the  
47  
48  
49 269 procurement practices in Nepal, it was reported that the majority of hospital pharmacies in Nepal  
50  
51 270 use an expensive direct procurement model for purchasing medicines. They relied on doctors'  
52  
53 271 prescriptions to choose a particular brand, which may be influenced by pharmaceutical companies'

1  
2  
3 272 marketing strategies. Most of the hospital pharmacies procured only registered medicines, a  
4  
5 273 minority reported purchasing unregistered medicines through unauthorized supply-chains. Not all  
6  
7 274 pharmacies followed Basel Statements during procurement of medicines. Such pharmacies may  
8  
9  
10 275 need awareness and training to fully adopt regulation of national and international policies to  
11  
12 276 enhance accessibility to quality medicines.

13  
14  
15  
16 277 Among the recalled groups, antimicrobial group of medicines had the highest frequency of recall  
17  
18 278 incidents. Acharya et.al<sup>27</sup> highlighted the problem of antimicrobial resistance in Nepal as an alarm  
19  
20 279 bell for worse public health situation. Suboptimal dose or poorly manufactured antibiotic medicine  
21  
22 280 increases the chance of antimicrobial resistance<sup>28</sup>. Most of the recalled therapeutic categories of  
23  
24 281 medicines like vitamins and minerals, NSAIDs, other antipyretic and analgesic agents, antiseptics,  
25  
26 282 fluid and electrolyte replenishment items and others are over-the-counter medicines that can be  
27  
28 283 brought from the pharmacy without prescription. Such medicines can pose a significant threat  
29  
30 284 patients who consume them<sup>29</sup>. Few anti-diabetes medicines were also recalled. Consumption of  
31  
32 285 such medicines may increase the incidence of macrovascular and microvascular complications due  
33  
34 286 to compromised glucose control<sup>30</sup>.

35  
36  
37  
38  
39 287 Our study showed that some of the drugs were recalled due to failure in various laboratory tests  
40  
41 288 like microbial test, assays, content uniformity test, weight variation, impurity test, dissolution test,  
42  
43 289 friability test as well as identification and sterility test. Many of these failures can be linked to  
44  
45 290 inadequate quality control measures during manufacturing and inappropriate procedures for  
46  
47 291 transportation and storage and other logistic issues<sup>17</sup>.

48  
49  
50 292 Jha *et. al.* pointed out that only 13% of 62 health facility inspected followed medicine storage  
51  
52 293 guidelines for light, heat and humidity<sup>18</sup>. Keeping the temperature and humidity within a specified  
53  
54 294 range is necessary because it has a major role in degradation of medicines. Another reason was  
55  
56  
57



1  
2  
3 295 failure to comply with claims and incorrect labelling. The DDA regulation requires appropriate  
4  
5 296 labelling of marketed medicines to ensure patient safety. Thus, drug analysts and the drug  
6  
7 297 regulators should be encouraged to remain vigilant about the possibility of counterfeiting  
8  
9  
10 298 possibility. They should conduct appropriate analysis including chemical, physical, package  
11  
12 299 inspection, and authentication efforts to ensure quality and safety of drugs getting to the ultimate  
13  
14 300 user<sup>31</sup>.

15  
16  
17 301 Domestically produced and imported medicines in Nepal should have the registration license from  
18  
19 302 DDA<sup>8</sup>. Nonetheless, we found that high numbers of unregistered drugs were recalled during the  
20  
21 303 inspection. Drug suppliers, wholesalers, and even retailers should ensure that the drugs they are  
22  
23 304 handling is duly registered with the national regulatory body to ensure only safe and efficacious  
24  
25 305 drugs get to the patient. Also, the regulatory body should conduct post-market surveillance to  
26  
27 306 ameliorate the situation. Unregistered medical products in Nepal may or may not have been  
28  
29 307 registered in India. Since Nepal shares open and poorly regulated boarder with India, drugs  
30  
31 308 registered in India are also easily sold in the Nepali market, especially in bordering districts. We  
32  
33 309 found that nearly half of the total recalled medicines were imported from India. India is the leading  
34  
35 310 country in counterfeit drug production, having as much as 35% of the world production originating  
36  
37 311 within its borders<sup>32</sup>.

38  
39  
40  
41  
42  
43 312 The COVID-19 pandemic has resulted in the surge of substandard and falsified medical products  
44  
45 313 including drugs, masks, sanitizers, diagnostic tests, and vaccines and other essential medical  
46  
47 314 products<sup>33</sup>. Rampant circulation of falsified medical products during emergencies has happened  
48  
49 315 throughout history<sup>33</sup>. Counterfeit respirators and masks pose additional risk to health care  
50  
51 316 workers<sup>34</sup>. Falsified chloroquine was seized in Cameroon, Congo and Niger between March and  
52  
53 317 May 2020. Chloroquine was controversially announced as the drug for the treatment of COVID-  
54  
55  
56  
57  
58  
59  
60

1  
2  
3 318 19<sup>35</sup>. The US FDA uncovered nearly 1,300 fraudulent products during early days of COVID-19<sup>36</sup>.  
4  
5 319 DDA Nepal has recently amended the standard for Instant Hand Sanitizer in order to prohibit  
6  
7 320 selling of substandard, falsified and unregistered sanitizers<sup>37</sup>. Between September and November  
8  
9 321 2020, the DDA issued recall notices for 19 hand sanitizers which failed to comply with the standard  
10  
11 322 guideline. Some sanitizers were found to contain methanol, rather than ethyl alcohol and isopropyl  
12  
13 323 alcohol. Methanol is very toxic. Use of hand sanitizer containing methanol may cause transdermal  
14  
15 324 absorption and increases the risk of systemic toxicity<sup>38</sup>. The increase in the demand for hand  
16  
17 325 sanitizers and other medicines in the face of COVID-19 has increased the growth of e-commerce.  
18  
19 326 Online sale of pharmaceutical products has just started in Nepal during recent years. WHO has  
20  
21 327 reported that 60% of medications purchased through the internet could be counterfeit or  
22  
23 328 substandard, and more than 50% of medications purchased online from sites that concealed their  
24  
25 329 actual physical address were found to be low quality medicines<sup>39</sup>. Nepali regulating agencies  
26  
27 330 should pay special attention to this new method of doing business in Nepal to protect the people  
28  
29 331 from consumption of low-quality and falsified medical products. Inexorable growth of online  
30  
31 332 pharmacies, unregulated websites and social media platforms for business may contribute to the  
32  
33 333 dispensing of unapproved, subpotent, counterfeit, expired or illegal drugs, and prescription drugs  
34  
35 334 without valid prescriptions<sup>40</sup>.  
36  
37  
38 335 Recall and alert from regulating agencies is important step, however more actions are necessary to  
39  
40 336 fully understand the substandard and falsified drugs circulation in the market and their potential  
41  
42 337 impact. Naughton and Akgul<sup>13</sup> argued that freely available drug alert and recall are not enough to  
43  
44 338 estimate medicine quality. Researchers have suggested to regulatory agencies to publish more  
45  
46 339 information such as exact number of recalled packs, numbers of samples collected and tested,  
47  
48 340 performed tests and results etc. Further, sampling methodologies for SF prevalence studies are  
49  
50  
51  
52  
53  
54  
55  
56  
57  
58  
59  
60

1  
2  
3 341 variable in terms of sample size, design methods consistency, reporting contextual factors,  
4  
5 342 resulting in not reliable comparison across studies.<sup>41</sup> Therefore a standardize protocol for testing  
6  
7 343 and reporting, global legal framework and surveillance systems of substandard and falsified drugs  
8  
9 344 are needed<sup>42</sup>. This could potentially help to compare the results from different countries and  
10  
11 345 understand from each other and make better policy interventions globally.<sup>13</sup>  
12  
13  
14

## 15 346 **CONCLUSION**

16  
17 347 In this paper, we presented a detailed pattern of low-quality and falsified drugs circulating in Nepal  
18  
19 348 in the past decade using recall notice. We showed that the number of recalled drugs has  
20  
21 349 significantly increased. This might be attributed either to a greater surveillance by DDA or actual  
22  
23 350 increase in the levels of substandard, falsified, and unregistered medicines in the market, similar  
24  
25 351 to previous studies<sup>12</sup>. However, our analysis was not enough to identify the exact cause of increase  
26  
27 352 in the recalled drugs. Like global trends, antimicrobial drugs were the most recalled drugs in Nepal.  
28  
29 353 The recall notices used did not provide information on the number of samples collected for testing  
30  
31 354 or inspection and location of sample collection. Therefore, our analysis did not report the rate or  
32  
33 355 prevalence of low-quality drugs. Since sample collection locations were not available, it was not  
34  
35 356 possible to know the most vulnerable districts of Nepal for low-quality drugs. Therefore, more  
36  
37 357 studies are needed to understand the prevalence of substandard and falsified drugs in Nepal  
38  
39 358 covering different parts of the country on regular basis. We suggest having more stringent  
40  
41 359 regulatory systems and implementation for pharmaceutical manufacturing industries and enhanced  
42  
43 360 post marketing surveillance.  
44  
45  
46  
47  
48  
49

50 361  
51 362 **Contributors:** BG contributed to conceptualization and study design, data analysis, manuscript  
52  
53 363 revision. AN, MB contributed to data collection, analysis and first draft. ST contributed to data  
54  
55 364 collection. All authors gave approval for the final version of the manuscript.  
56  
57  
58  
59  
60

1  
2  
3 365

4  
5 366 **Funding:** No specific funding supported this.

6  
7  
8 367

9  
10 368 **Competing interests:** None declared.

11  
12 369

13  
14 370 **Data sharing:** All data relevant to the study are included in the article or uploaded as  
15  
16  
17 371 supplementary information. Author compiled & curated raw data will be made available with a  
18  
19 372 reasonable request to corresponding author.

20  
21 373

22  
23 374 **Ethical approval:** This study does not involve human participants.

24  
25  
26 375  
27  
28  
29  
30  
31  
32  
33  
34  
35  
36  
37  
38  
39  
40  
41  
42  
43  
44  
45  
46  
47  
48  
49  
50  
51  
52  
53  
54  
55  
56  
57  
58  
59  
60

376 **References**

- 377 1. Seiter, A. Health and Economic Consequences of Counterfeit Drugs. *Clin. Pharmacol. Ther.* **85**, 576–578 (2009).
- 378 2. WHO | Pharmaceutical products. *WHO* [http://www.who.int/topics/pharmaceutical\\_products/en/](http://www.who.int/topics/pharmaceutical_products/en/).
- 379 3. Ozawa, S. *et al.* Prevalence and Estimated Economic Burden of Substandard and Falsified Medicines in Low- and Middle-  
380 Income Countries: A Systematic Review and Meta-analysis. *JAMA Netw. Open* **1**, e181662 (2018).
- 381 4. OECD & European Union Intellectual Property Office. *Trade in Counterfeit Pharmaceutical Products*. (OECD, 2020).  
382 doi:10.1787/a7c7e054-en.
- 383 5. Sharma, N., Barstis, T. & Giri, B. Advances in paper-analytical methods for pharmaceutical analysis. *Eur. J. Pharm. Sci.* **111**,  
384 46–56 (2018).
- 385 6. Least Developed Country Category: Nepal Profile | Department of Economic and Social Affairs.  
386 <https://www.un.org/development/desa/dpad/least-developed-country-category-nepal.html>.
- 387 7. Setopati. Domestic medicine market expanding. <https://en.setopati.com/market/126366/>.
- 388 8. DDA: Drugs Act 2035. <https://www.dda.gov.np/content/drugs-act-2035>.
- 389 9. Gyanwali, P. *et al.* Surveillance of Quality of Medicines Available in the Nepalese Market: A Study from Kathmandu Valley. *J.*  
390 *Nepal Health Res. Counc.* **13**, 233–240 (2015).
- 391 10. Poudel, R. S., Shrestha, S., Thapa, S., Poudel, B. K. & Chhetri, M. Assessment of primary labeling of medicines manufactured  
392 by Nepalese pharmaceutical industries. *J. Pharm. Policy Pract.* **11**, 13 (2018).
- 393 11. Poudel, A., Mohamed Ibrahim, M. I., Mishra, P. & Palaian, S. Assessment of the availability and rationality of unregistered  
394 fixed dose drug combinations in Nepal: a multicenter cross-sectional study. *Glob. Health Res. Policy* **2**, 14 (2017).
- 395 12. Almuzaini, T., Sammons, H. & Choonara, I. Substandard and falsified medicines in the UK: a retrospective review of drug  
396 alerts (2001–2011). *BMJ Open* **3**, e002924 (2013).
- 397 13. Medicine quality in high-income countries: The obstacles... - Google Scholar.  
398 [https://scholar.google.com/scholar?hl=en&as\\_sdt=0%2C5&q=Medicine+quality+in+high-](https://scholar.google.com/scholar?hl=en&as_sdt=0%2C5&q=Medicine+quality+in+high-)  
399 [income+countries%3A+The+obstacles+to+comparative+prevalence+studies&btnG=](https://scholar.google.com/scholar?hl=en&as_sdt=0%2C5&q=Medicine+quality+in+high-income+countries%3A+The+obstacles+to+comparative+prevalence+studies&btnG=).
- 400 14. AlQuadeib, B. T., Alfagih, I. M., Alnahdi, A. H., Alharbi, S. M. & Al-ahmari, R. A. Medicine recalls in Saudi Arabia: a  
401 retrospective review of drug alerts (January 2010–January 2019). *Future J. Pharm. Sci.* **6**, 1–10 (2020).
- 402 15. DDA: Essential Drug List. <https://www.dda.gov.np/content/essential-drug-list>.
- 403 16. Substandard and falsified medical products. <https://www.who.int/news-room/fact-sheets/detail/substandard-and-falsified->  
404 [medical-products](https://www.who.int/news-room/fact-sheets/detail/substandard-and-falsified-medical-products).

- 1  
2  
3 405 17. WHO | WHO Global Surveillance and Monitoring System for substandard and falsified medical products. *WHO*  
4  
5 406 <http://www.who.int/medicines/regulation/ssffc/publications/gsms-report-sf/en/>.  
6  
7 407 18. Jha, A. K. *et al.* *Quality of essential medicines in public health care facilities of Nepal–2019*. 1–16 [http://nhrc.gov.np/wp-](http://nhrc.gov.np/wp-content/uploads/2020/08/Drug-report.pdf)  
8  
9 408 [content/uploads/2020/08/Drug-report.pdf](http://nhrc.gov.np/wp-content/uploads/2020/08/Drug-report.pdf) (2019).  
10  
11 409 19. Gyanwali, P. *et al.* *Surveillance of Quality of Medicines Available in the Nepalese Market: A Study from Kathmandu Valley. J.*  
12  
13 410 *Nepal Health Res. Counc.* (2015).  
14  
15 411 20. Research, C. for D. E. and. Drug Recalls. *FDA* <https://www.fda.gov/drugs/drug-safety-and-availability/drug-recalls> (2019).  
16  
17 412 21. Nagaich, U. & Sadhna, D. Drug recall: An incubus for pharmaceutical companies and most serious drug recall of history. *Int.*  
18  
19 413 *J. Pharm. Investig.* **5**, 13–19 (2015).  
20  
21 414 22. Hall, K., Stewart, T., Chang, J. & Freeman, M. K. Characteristics of FDA drug recalls: A 30-month analysis. *Am. J. Health-Syst.*  
22  
23 415 *Pharm. AJHP Off. J. Am. Soc. Health-Syst. Pharm.* **73**, 235–240 (2016).  
24  
25 416 23. Shrestha, S., Danekhu, K., Sapkota, B., Jha, N. & Kc, B. Herbal pharmacovigilance in Nepal: challenges and recommendations.  
26  
27 417 *F1000Research* **9**, 111 (2020).  
28  
29 418 24. WHO. WHO global report on traditional and complementary medicine 2019. [https://www.who.int/publications-detail-](https://www.who.int/publications-detail-redirect/978924151536)  
30  
31 420 [redirect/978924151536](https://www.who.int/publications-detail-redirect/978924151536).  
32  
33 421 25. WHO | Essential medicines. *WHO* [http://www.who.int/medicines/services/essmedicines\\_def/en/](http://www.who.int/medicines/services/essmedicines_def/en/).  
34  
35 422 26. Shrestha, M., Moles, R., Ranjit, E. & Char, B. Medicine procurement in hospital pharmacies of Nepal: A qualitative study  
36  
37 423 based on the Basel Statements. *PLoS One* **13**, e0191778 (2018).  
38  
39 424 27. Acharya, K. P. & Wilson, R. T. Antimicrobial Resistance in Nepal. *Front. Med.* **6**, 105 (2019).  
40  
41 425 28. Kelesidis, T. & Falagas, M. E. Substandard/counterfeit antimicrobial drugs. *Clin. Microbiol. Rev.* **28**, 443–464 (2015).  
42  
43 426 29. Rojas-Cortés, R. Substandard, falsified and unregistered medicines in Latin America, 2017-2018. *Rev. Panam. Salud Publica*  
44  
45 427 *Pan Am. J. Public Health* **44**, e125 (2020).  
46  
47 428 30. Saraswati, K., Sichanh, C., Newton, P. N. & Caillet, C. Quality of medical products for diabetes management: a systematic  
48  
49 429 review. *BMJ Glob. Health* **4**, e001636 (2019).  
50  
51 430 31. Alghannam, A., Aslanpour, Z., Evans, S. & Schifano, F. A systematic review of counterfeit and substandard medicines in field  
52  
53 431 quality surveys. *Integr. Pharm. Res. Pract.* **3**, 71–88 (2014).  
54  
55 432 32. Wertheimer, A. I. & Santella, T. M. Counterfeit drugs: defining the problem and finding solutions. *Expert Opin. Drug Saf.* **4**,  
56  
57 619–622 (2005).  
58  
59  
60

- 1  
2  
3 433 33. Newton, P. N. *et al.* COVID-19 and risks to the supply and quality of tests, drugs, and vaccines. *Lancet Glob. Health* **8**, e754–  
4 434 e755 (2020).  
5  
6 435 34. Ippolito, M., Gregoretti, C., Cortegiani, A. & Iozzo, P. Counterfeit filtering facepiece respirators are posing an additional risk  
7 436 to health care workers during COVID-19 pandemic. *Am. J. Infect. Control* **48**, 853–854 (2020).  
8  
9 437 35. Waffo Tchounga, C. A. *et al.* Composition analysis of falsified chloroquine phosphate samples seized during the COVID-19  
10 438 pandemic. *J. Pharm. Biomed. Anal.* **194**, 113761 (2021).  
11  
12 439 36. McMeekin, J. National Consumer Protection Week: FDA Is Vigilant in Protecting Consumers Against COVID-19 Vaccine  
13 440 Scams. *FDA* (2021).  
14  
15 441 37. DDA. DDA: Instant Hand Sanitizer (Alcohol Based) सम्बन्धी अत्यन्त जरूरी सूचना. (2020).  
16  
17 442 38. Chan, A. P. L. & Chan, T. Y. K. Methanol as an Unlisted Ingredient in Supposedly Alcohol-Based Hand Rub Can Pose Serious  
18 443 Health Risk. *Int. J. Environ. Res. Public Health* **15**, (2018).  
19  
20 444 39. Ashames, A., Bhandare, R., Zain AlAbdin, S., Alhalabi, T. & Jassem, F. Public Perception toward E-commerce of Medicines  
21 445 and Comparative Pharmaceutical Quality Assessment Study of Two Different Products of Furosemide Tablets from  
22 446 Community and Illicit Online Pharmacies. *J. Pharm. Bioallied Sci.* **11**, 284–291 (2019).  
23  
24 447 40. Fung, C. H., Woo, H. E. & Asch, S. M. Controversies and legal issues of prescribing and dispensing medications using the  
25 448 Internet. *Mayo Clin. Proc.* **79**, 188–194 (2004).  
26  
27 449 41. McManus, D. & Naughton, B. D. A systematic review of substandard, falsified, unlicensed and unregistered medicine  
28 450 sampling studies: a focus on context, prevalence, and quality. *BMJ Glob. Health* **5**, e002393 (2020).  
29  
30 451 42. Mackey, T. K. Prevalence of substandard and Falsified essential medicines: still an incomplete picture. *JAMA Netw. Open* **1**,  
31 452 e181685–e181685 (2018).  
32  
33  
34  
35  
36  
37  
38  
39  
40  
41 453

1  
2  
3  
4  
5  
6  
7  
8  
9  
10  
11  
12  
13  
14  
15  
16  
17  
18  
19  
20  
21  
22  
23  
24  
25  
26  
27  
28  
29  
30  
31  
32  
33  
34  
35  
36  
37  
38  
39  
40  
41  
42  
43  
44  
45  
46  
47  
48  
49  
50  
51  
52  
53  
54  
55  
56  
57  
58  
59  
60

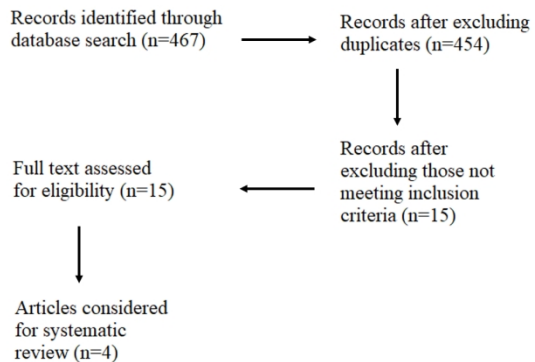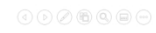

Figure 1: Flow chart of research papers search procedure

1283x721mm (38 x 38 DPI)



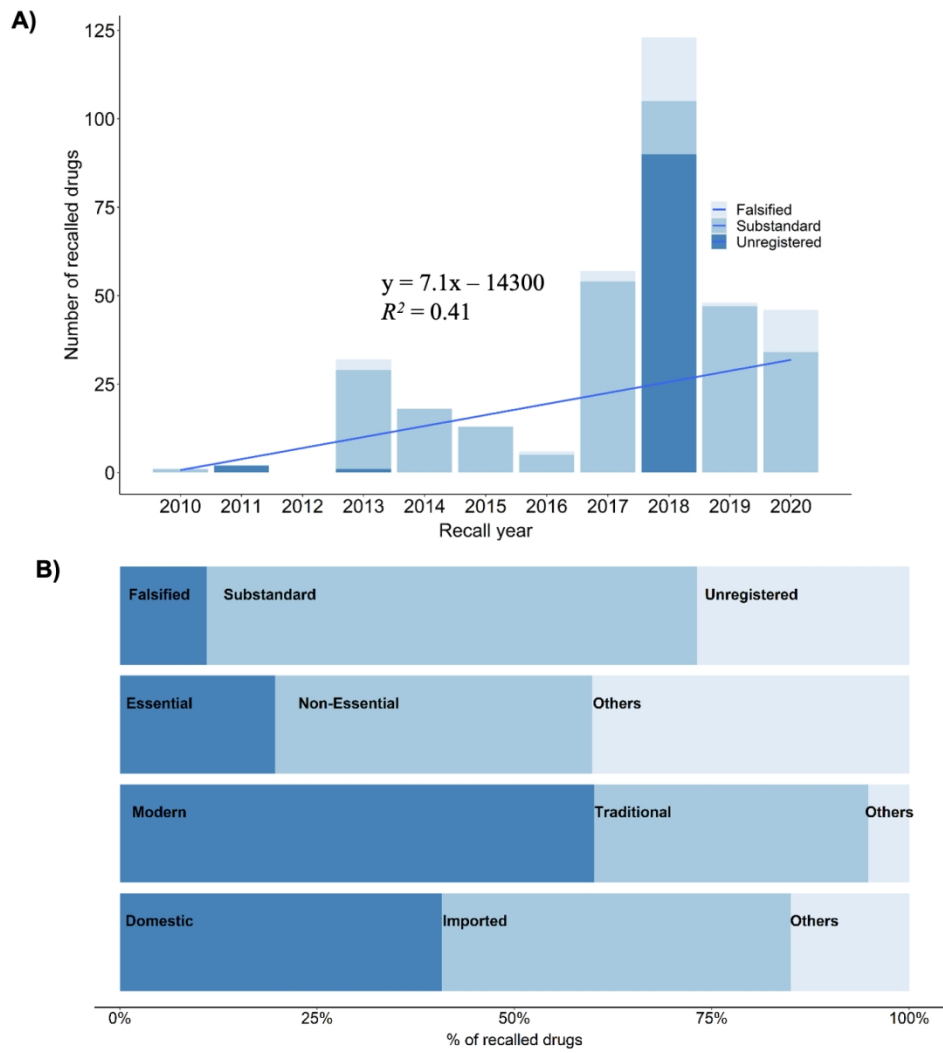

Figure 2: (A) Temporal trend of recalled pharmaceutical products in Nepal. (B) Contribution of different categories of pharmaceutical products in the recall list.

671x719mm (57 x 57 DPI)

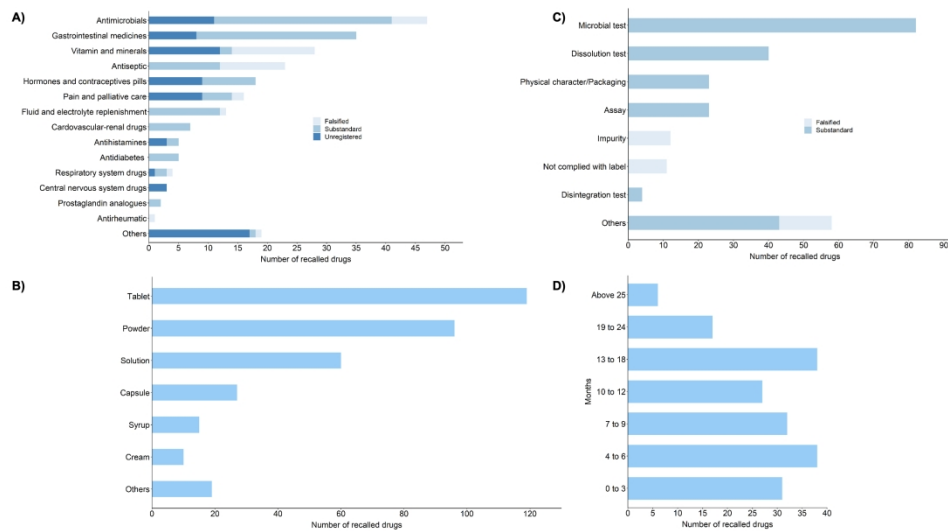

Figure 3: (A) Categories of recalled drugs based on their therapeutics, (B) Types of dosage forms of recalled drugs, (C) Major reasons for recalling the pharmaceutical products, (D) Self life of recalled pharmaceutical products after the recall (in months).

1283x719mm (57 x 57 DPI)

# Pattern of drug recalls and quality of pharmaceutical products in

## Nepal

Astha Neupane, Maheshwor Bastakoti, Sabita Tamang, Basant Giri\*

Center for Analytical Sciences, Kathmandu Institute of Applied Sciences, P. O. Box 23002,

Kathmandu, Nepal

### Supplementary Material

Table S1: Result of literature search of peer-reviewed documents reporting drug quality data

| Keywords                                                                                                     | Number of articles found |                |               |                |
|--------------------------------------------------------------------------------------------------------------|--------------------------|----------------|---------------|----------------|
|                                                                                                              | PubMed                   | Web of Science | Springer link | Google Scholar |
| Counterfeit* OR substandard* OR fake<br>OR spurious OR unregulated OR<br>unregistered OR falsified* OR fraud | 14532                    | 51113          | 71770         | 41100          |
| Drug OR medicine OR pharmaceutical                                                                           | 4977168                  | 4579007        | 1386455       | 728000         |
| Nepal*                                                                                                       | 12868                    | 18132          | 16862         | 26500          |
| 1 AND 2 AND 3                                                                                                | 13                       | 10             | 393           | 51             |

### List of research papers that included drug quality in Nepal

1. Poudel, Ramesh Sharma, et al. "Assessment of primary labeling of medicines manufactured by Nepalese pharmaceutical industries." *Journal of pharmaceutical policy and practice* 11.1 (2018): 1-6.
2. Gyanwali, P., et al. "Surveillance of Quality of Medicines Available in the Nepalese Market: A Study from Kathmandu Valley." *Journal of Nepal Health Research Council* (2015).
3. Poudel, Arjun, et al. "Assessment of the availability and rationality of unregistered fixed dose drug combinations in Nepal: a multicenter cross-sectional study." *Global health research and policy* 2.1 (2017): 1-13.
4. Jha, A. K., et al. *Quality of essential medicines in public health care facilities of Nepal–2019*. Nepal Health Research Council, 2019.

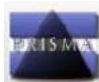

# PRISMA 2020 Checklist

| Section and Topic             | Item # | Checklist item                                                                                                                                                                                                                                                                                       | Location where item is reported |
|-------------------------------|--------|------------------------------------------------------------------------------------------------------------------------------------------------------------------------------------------------------------------------------------------------------------------------------------------------------|---------------------------------|
| <b>TITLE</b>                  |        |                                                                                                                                                                                                                                                                                                      |                                 |
| Title                         | 1      | Identify the report as a systematic review.                                                                                                                                                                                                                                                          | -                               |
| <b>ABSTRACT</b>               |        |                                                                                                                                                                                                                                                                                                      |                                 |
| Abstract                      | 2      | See the PRISMA 2020 for Abstracts checklist.                                                                                                                                                                                                                                                         | Page 2                          |
| <b>INTRODUCTION</b>           |        |                                                                                                                                                                                                                                                                                                      |                                 |
| Rationale                     | 3      | Describe the rationale for the review in the context of existing knowledge.                                                                                                                                                                                                                          | Page 4                          |
| Objectives                    | 4      | Provide an explicit statement of the objective(s) or question(s) the review addresses.                                                                                                                                                                                                               | Page 5                          |
| <b>METHODS</b>                |        |                                                                                                                                                                                                                                                                                                      |                                 |
| Eligibility criteria          | 5      | Specify the inclusion and exclusion criteria for the review and how studies were grouped for the syntheses.                                                                                                                                                                                          | Page 6                          |
| Information sources           | 6      | Specify all databases, registers, websites, organisations, reference lists and other sources searched or consulted to identify studies. Specify the date when each source was last searched or consulted.                                                                                            | Page 5&6                        |
| Search strategy               | 7      | Present the full search strategies for all databases, registers and websites, including any filters and limits used.                                                                                                                                                                                 | Page 6                          |
| Selection process             | 8      | Specify the methods used to decide whether a study met the inclusion criteria of the review, including how many reviewers screened each record and each report retrieved, whether they worked independently, and if applicable, details of automation tools used in the process.                     | Page 5&6                        |
| Data collection process       | 9      | Specify the methods used to collect data from reports, including how many reviewers collected data from each report, whether they worked independently, any processes for obtaining or confirming data from study investigators, and if applicable, details of automation tools used in the process. | Page 5&6                        |
| Data items                    | 10a    | List and define all outcomes for which data were sought. Specify whether all results that were compatible with each outcome domain in each study were sought (e.g. for all measures, time points, analyses), and if not, the methods used to decide which results to collect.                        | -                               |
|                               | 10b    | List and define all other variables for which data were sought (e.g. participant and intervention characteristics, funding sources). Describe any assumptions made about any missing or unclear information.                                                                                         | -                               |
| Study risk of bias assessment | 11     | Specify the methods used to assess risk of bias in the included studies, including details of the tool(s) used, how many reviewers assessed each study and whether they worked independently, and if applicable, details of automation tools used in the process.                                    | -                               |
| Effect measures               | 12     | Specify for each outcome the effect measure(s) (e.g. risk ratio, mean difference) used in the synthesis or presentation of results.                                                                                                                                                                  | -                               |
| Synthesis methods             | 13a    | Describe the processes used to decide which studies were eligible for each synthesis (e.g. tabulating the study intervention characteristics and comparing against the planned groups for each synthesis (item #5)).                                                                                 | Page 6                          |
|                               | 13b    | Describe any methods required to prepare the data for presentation or synthesis, such as handling of missing summary statistics, or data conversions.                                                                                                                                                | Page 7                          |
|                               | 13c    | Describe any methods used to tabulate or visually display results of individual studies and syntheses.                                                                                                                                                                                               | Page 7                          |
|                               | 13d    | Describe any methods used to synthesize results and provide a rationale for the choice(s). If meta-analysis was performed, describe the model(s), method(s) to identify the presence and extent of statistical heterogeneity, and software package(s) used.                                          | Page 7                          |
|                               | 13e    | Describe any methods used to explore possible causes of heterogeneity among study results (e.g. subgroup analysis, meta-regression).                                                                                                                                                                 | -                               |
|                               | 13f    | Describe any sensitivity analyses conducted to assess robustness of the synthesized results.                                                                                                                                                                                                         | -                               |
| Reporting bias assessment     | 14     | Describe any methods used to assess risk of bias due to missing results in a synthesis (arising from reporting biases).                                                                                                                                                                              | -                               |
| Certainty                     | 15     | Describe any methods used to assess certainty (or confidence) in the body of evidence for an outcome.                                                                                                                                                                                                | -                               |

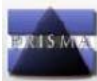

# PRISMA 2020 Checklist

| Section and Topic              | Item # | Checklist item                                                                                                                                                                                                                                                                                                                                                                                                         | Location where item is reported |
|--------------------------------|--------|------------------------------------------------------------------------------------------------------------------------------------------------------------------------------------------------------------------------------------------------------------------------------------------------------------------------------------------------------------------------------------------------------------------------|---------------------------------|
| assessment                     |        |                                                                                                                                                                                                                                                                                                                                                                                                                        |                                 |
| <b>RESULTS</b>                 |        |                                                                                                                                                                                                                                                                                                                                                                                                                        |                                 |
| Study selection                | 16a    | Describe the results of the search and selection process, from the number of records identified in the search to the number of studies included in the review, ideally using a flow diagram.                                                                                                                                                                                                                           | Page 7&9                        |
|                                | 16b    | Cite studies that might appear to meet the inclusion criteria, but which were excluded, and explain why they were excluded.                                                                                                                                                                                                                                                                                            | Page 9                          |
| Study characteristics          | 17     | Cite each included study and present its characteristics.                                                                                                                                                                                                                                                                                                                                                              | Page 7                          |
| Risk of bias in studies        | 18     | Present assessments of risk of bias for each included study.                                                                                                                                                                                                                                                                                                                                                           | Page 16                         |
| Results of individual studies  | 19     | For all outcomes, present, for each study: (a) summary statistics for each group (where appropriate) and (b) an effect estimate and its precision (e.g. confidence/credible interval), ideally using structured tables or plots.                                                                                                                                                                                       | Page 7-9                        |
| Results of syntheses           | 20a    | For each synthesis, briefly summarise the characteristics and risk of bias among contributing studies.                                                                                                                                                                                                                                                                                                                 | -                               |
|                                | 20b    | Present results of all statistical syntheses conducted. If meta-analysis was done, present for each the summary estimate and its precision (e.g. confidence/credible interval) and measures of statistical heterogeneity. If comparing groups, describe the direction of the effect.                                                                                                                                   | Page 7-9                        |
|                                | 20c    | Present results of all investigations of possible causes of heterogeneity among study results.                                                                                                                                                                                                                                                                                                                         | -                               |
|                                | 20d    | Present results of all sensitivity analyses conducted to assess the robustness of the synthesized results.                                                                                                                                                                                                                                                                                                             | -                               |
| Reporting biases               | 21     | Present assessments of risk of bias due to missing results (arising from reporting biases) for each synthesis assessed.                                                                                                                                                                                                                                                                                                | -                               |
| Certainty of evidence          | 22     | Present assessments of certainty (or confidence) in the body of evidence for each outcome assessed.                                                                                                                                                                                                                                                                                                                    | -                               |
| <b>DISCUSSION</b>              |        |                                                                                                                                                                                                                                                                                                                                                                                                                        |                                 |
| Discussion                     | 23a    | Provide a general interpretation of the results in the context of other evidence.                                                                                                                                                                                                                                                                                                                                      | Page 11-15                      |
|                                | 23b    | Discuss any limitations of the evidence included in the review.                                                                                                                                                                                                                                                                                                                                                        | Page 16                         |
|                                | 23c    | Discuss any limitations of the review processes used.                                                                                                                                                                                                                                                                                                                                                                  | Page 16                         |
|                                | 23d    | Discuss implications of the results for practice, policy, and future research.                                                                                                                                                                                                                                                                                                                                         | Page 15&16                      |
| <b>OTHER INFORMATION</b>       |        |                                                                                                                                                                                                                                                                                                                                                                                                                        |                                 |
| Registration and protocol      | 24a    | Provide registration information for the review, including register name and registration number, or state that the review was not registered.                                                                                                                                                                                                                                                                         | Not registered                  |
|                                | 24b    | Indicate where the review protocol can be accessed, or state that a protocol was not prepared.                                                                                                                                                                                                                                                                                                                         | Not prepared                    |
|                                | 24c    | Describe and explain any amendments to information provided at registration or in the protocol.                                                                                                                                                                                                                                                                                                                        | -                               |
| Support                        | 25     | Describe sources of financial or non-financial support for the review, and the role of the funders or sponsors in the review.                                                                                                                                                                                                                                                                                          | None                            |
| Competing interests            | 26     | Declare any competing interests of review authors.                                                                                                                                                                                                                                                                                                                                                                     | None                            |
| Availability of data, code and | 27     | Report which of the following are publicly available and where they can be found: template data collection forms; data extracted from included studies; data used for all analyses, analytic code; any other materials used in the review. <a href="https://www.bmj.com/lookup/other-materials-used-in-the-review-guidelines.xhtml">https://www.bmj.com/lookup/other-materials-used-in-the-review-guidelines.xhtml</a> | Data used for analysis          |

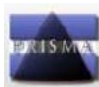

PRISMA 2020 Checklist

1  
2  
3  
4  
5  
6  
7  
8  
9  
10  
11  
12  
13  
14  
15  
16  
17  
18  
19  
20  
21  
22  
23  
24  
25  
26  
27  
28  
29  
30  
31  
32  
33  
34  
35  
36  
37  
38  
39  
40  
41  
42  
43  
44  
45  
46  
47

| Section and Topic | Item # | Checklist item | Location where item is reported |
|-------------------|--------|----------------|---------------------------------|
| other materials   |        |                |                                 |

From: Page MJ, McKenzie JE, Bossuyt PM, Boutron I, Hoffmann TC, Mulrow CD, et al. The PRISMA 2020 statement: an updated guideline for reporting systematic reviews. *BMJ* 2021;372:n71. doi: 10.1136/bmj.n71  
 For more information, visit: <http://www.prisma-statement.org/>

For peer review only
